# Supplementary material for: Multicolor and sign-invertible circularly polarized luminescence from nonchiral charge-transfer complexes assembled with N-terminal aromatic amino acids
Source: Royal Society of Chemistry journal article supplement (doi:10.1039/d4nr04308a), 2024-11-21
Supplement: d4nr04308a1.pdf [file d4nr04308a1.pdf]

## Supporting Information

### **Multicolor and Sign-Invertible Circularly Polarized Luminescence from Nonchiral Charge-Transfer Complexes Assembled with *N*-Terminal Aromatic Amino Acids**

Liyun Lai,<sup>a</sup> Shunan Wang,<sup>a</sup> Yunxiao Sang,<sup>a</sup> Chen Feng,<sup>b</sup> Min Liu,<sup>a</sup> Fang Wang,<sup>\*a</sup> Shaoliang Lin<sup>\*\*a</sup>  
and Quan Zhou<sup>\*a</sup>

<sup>a</sup>School of Materials Science and Engineering, East China University of Science and Technology,  
Shanghai 200237, China. E-mail: [1509wangfang@ecust.edu.cn](mailto:1509wangfang@ecust.edu.cn) (Fang Wang),  
[slin@ecust.edu.cn](mailto:slin@ecust.edu.cn) (Shaoliang Lin), [gzhou@ecust.edu.cn](mailto:gzhou@ecust.edu.cn) (Quan Zhou).

<sup>b</sup>School of Chemistry and Molecular Engineering, East China University of Science and  
Technology, Shanghai 200237, China.

## Experimental section

### Materials

All reagents and solvents were used as received without further purification. *N,N*-dimethylformamide (DMF), Fmoc-*L*-alanine (***L*Ala**), Fmoc-*D*-alanine (***D*Ala**), Fmoc-*L*-phenylalanine (***L*Phe**), Fmoc-*D*-phenylalanine (***D*Phe**), Fmoc-*L*-tyrosine (***L*Tyr**) and Fmoc-*D*-tyrosine (***D*Tyr**) were purchased from Macklin. Naphthalene (**D1**), anthracene (**D2**), phenanthrene (**D3**), benzo[*a*]phenanthrene (**D4**), triphenylene (**D5**) and 1,2,4,5-tetracyanobenzene (**TCNB**) were purchased from Bore. All water used in this work was deionized water which obtained from Titan.

### Preparation of assemblies

Self-assembly of different samples were triggered by a nanoprecipitation method. Taking the ***L*Phe/D1/TCNB** assemblies as an example, ***L*Phe** (2.17 mg, 5.6 mmol), **D1** (0.72 mg, 5.6 mmol) and **TCNB** (1 mg, 5.6 mmol) were dissolved in DMF (50  $\mu$ L) by vigorous shaking in a septum-capped 5 mL glass vial. Then, by adding water (950  $\mu$ L) into the mixture, followed by aging at room temperature for at least 24 h, a colloidal suspension was eventually obtained.

### Characterization

UV-vis spectra were recorded on a Shimadzu UV-2600i spectrometer (Shimadzu, Japan) at room temperature in a 10 mm quartz cell. Fluorescence spectra were measured using a Perkin Elmer LS 55 spectrometer (Perkin Elmer, America). Circular dichroism (CD) and circularly polarized luminescence (CPL) spectra of the suspension and solution samples were measured in quartz cuvettes (light path length 1 mm) on JASCO J-810 and JASCO CPL-300 spectrophotometers (JASCO, Japan), respectively. Scanning electron microscopy (SEM) was performed on a S-4800 microscope (Hitachi, Japan) with an accelerating voltage of 10 kV. One drop of the as-prepared suspension samples was deposited on a polished silicon wafer, followed by drying and coating with a thin layer of Au to enhance the contrast. Fourier transform infrared (FTIR) spectra were measured on IRAffinity-1 Fourier infrared spectrometer (Shimadzu, Japan). Powder X-ray diffraction (XRD) data were measured on an Ultima IV X-ray diffractometer (Rigaku, Japan) operated in  $2\theta$  range from 3° to 30.0° at room temperature.

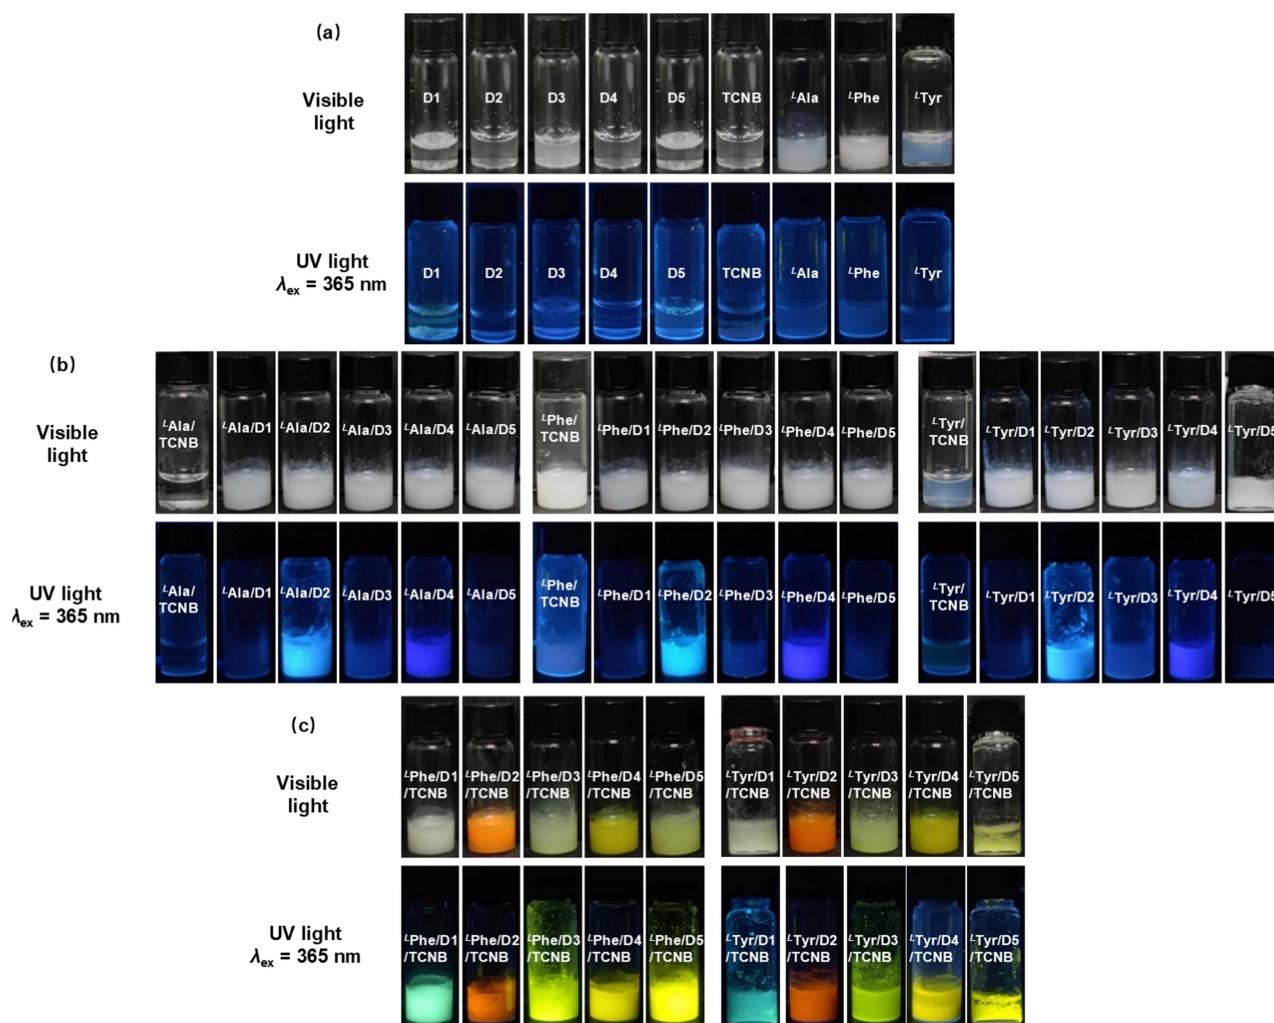

**Fig. S1** Photographs of (a) individual **D1-5**, **TCNB**, <sup>L</sup>**Ala**, <sup>L</sup>**Phe** and <sup>L</sup>**Tyr** (5.6 mM) assemblies, (b) binary assemblies of <sup>L</sup>**Ala/TCNB**, <sup>L</sup>**Ala/D1-5**, <sup>L</sup>**Phe/TCNB**, <sup>L</sup>**Phe/D1-5**, <sup>L</sup>**Tyr/TCNB** and <sup>L</sup>**Tyr/D1-5** (5.6 mM:5.6 mM), and (c) ternary assemblies of <sup>L</sup>**Phe/D1-5/TCNB** and <sup>L</sup>**Tyr/D1-5/TCNB** (5.6 mM:5.6 mM:5.6 mM) formed in DMF/H<sub>2</sub>O (1/19, v/v) under visible light and UV light ( $\lambda_{\text{ex}} = 365 \text{ nm}$ ).

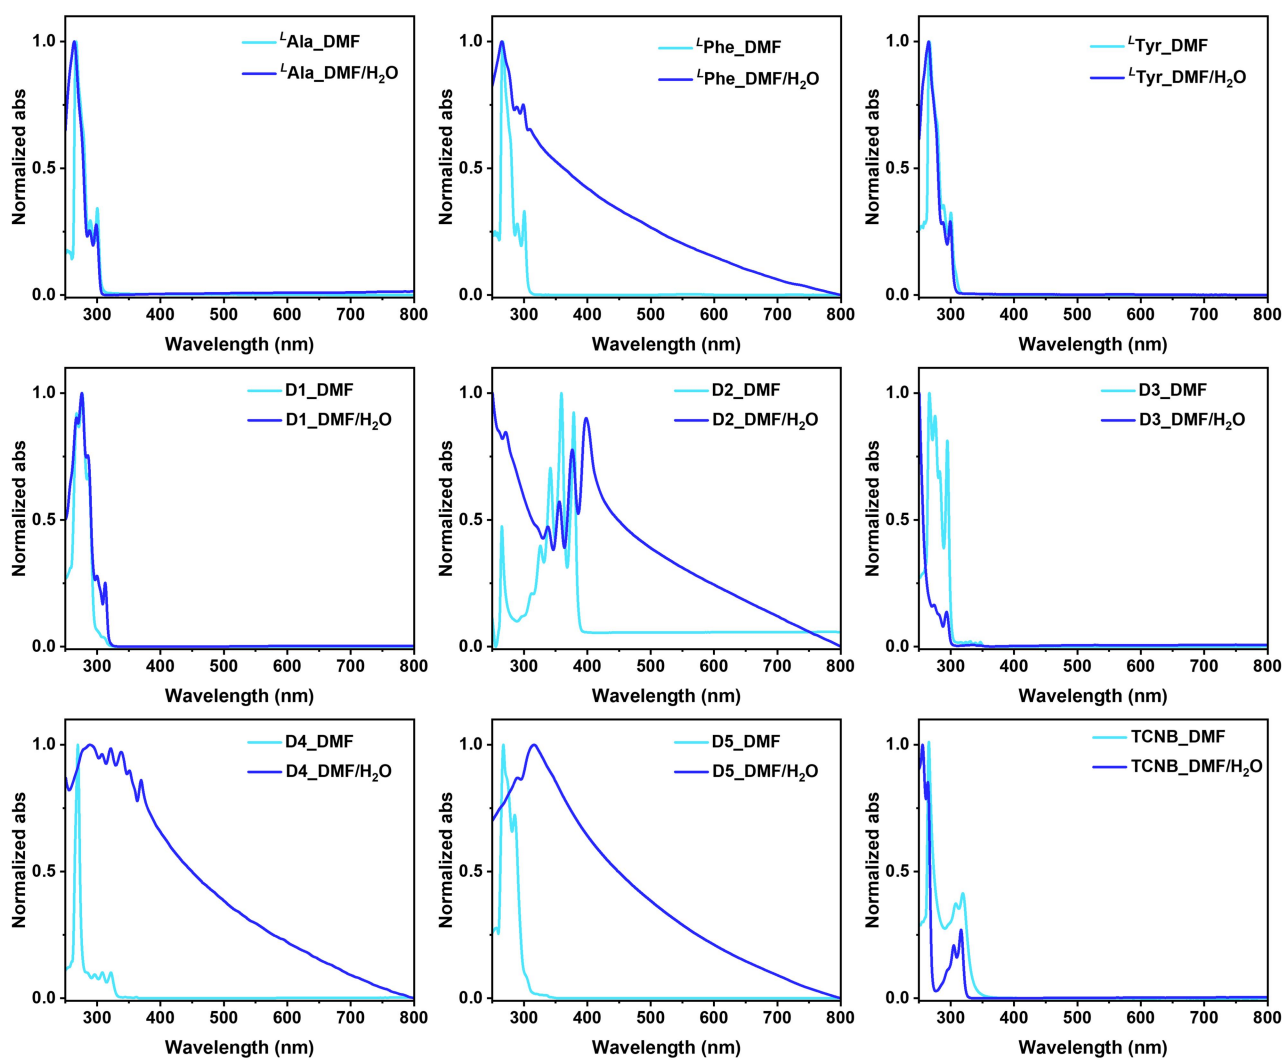

**Fig. S2** Normalized UV-vis spectra of individual *L*-Ala, *L*-Phe, *L*-Tyr, D1-5 and TCNB (5.6 mM) in DMF and DMF/H<sub>2</sub>O (1/19, v/v).

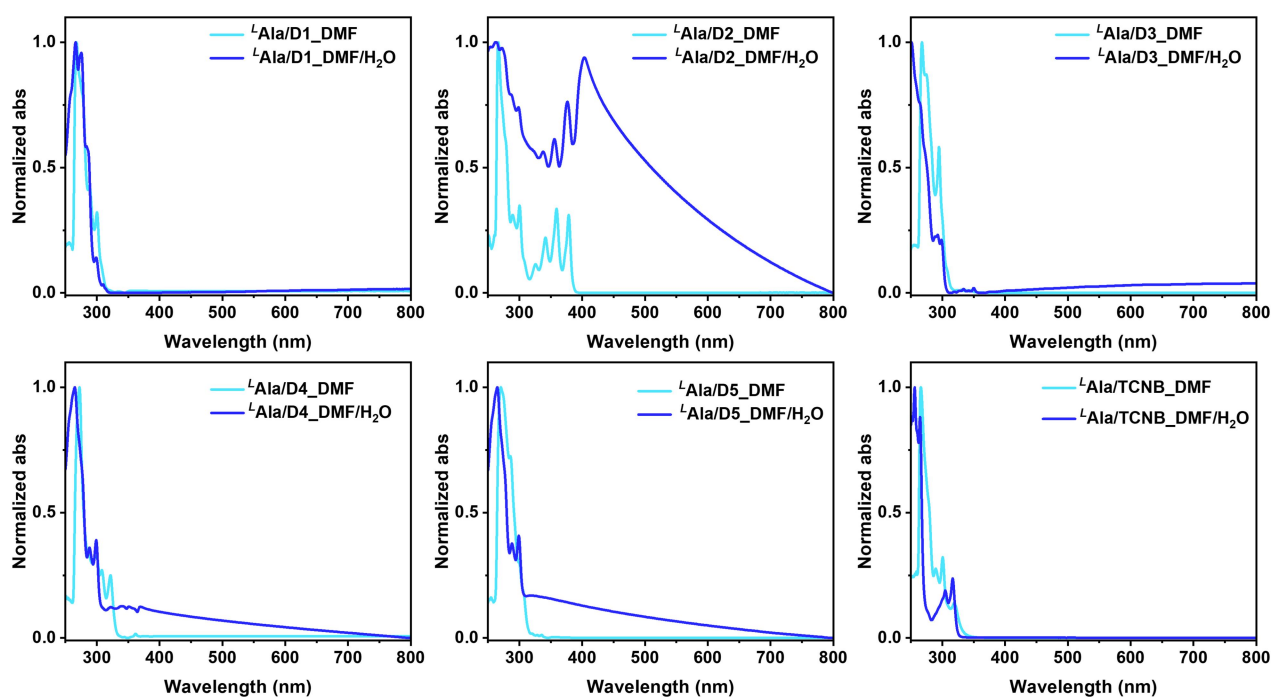

**Fig. S3** Normalized UV-vis spectra of  $L$ -Ala/D1-5 and  $L$ -Ala/TCNB (5.6 mM:5.6 mM) in DMF and DMF/H<sub>2</sub>O (1/19, v/v).

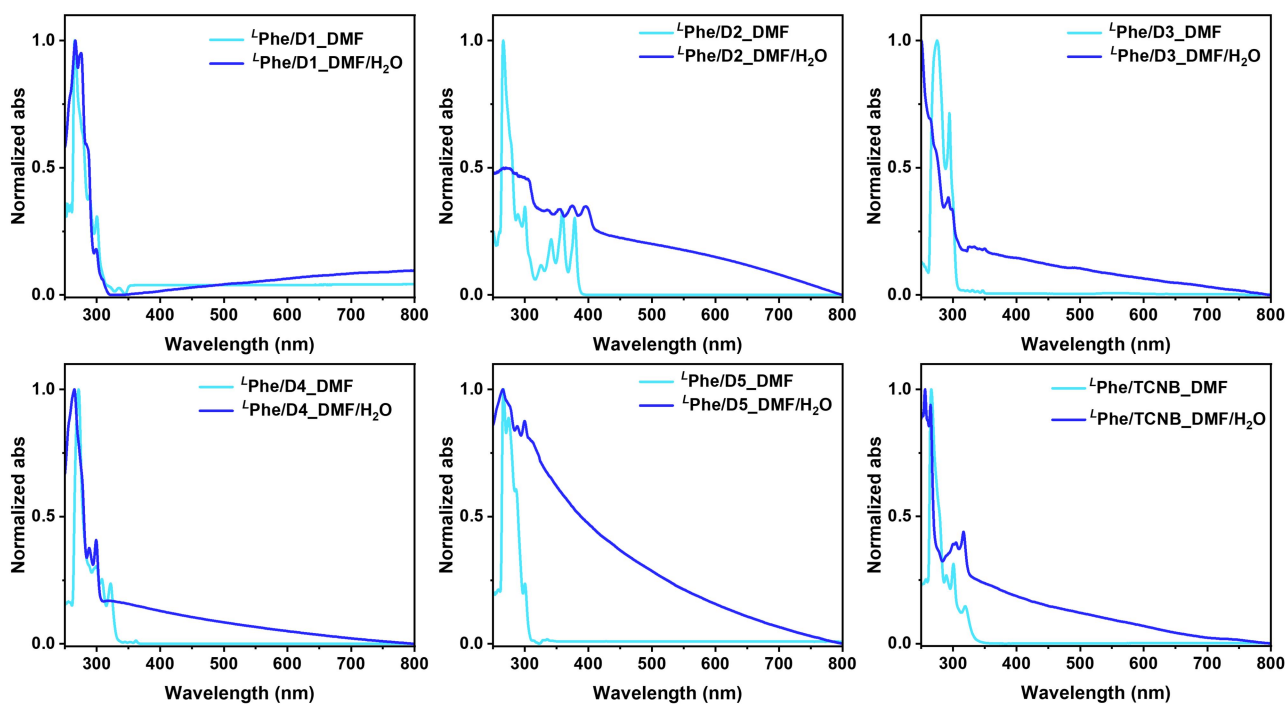

**Fig. S4** Normalized UV-vis spectra of  $L$ -Phe/D1-5 and  $L$ -Phe/TCNB (5.6 mM:5.6 mM) in DMF and DMF/H<sub>2</sub>O (1/19, v/v).

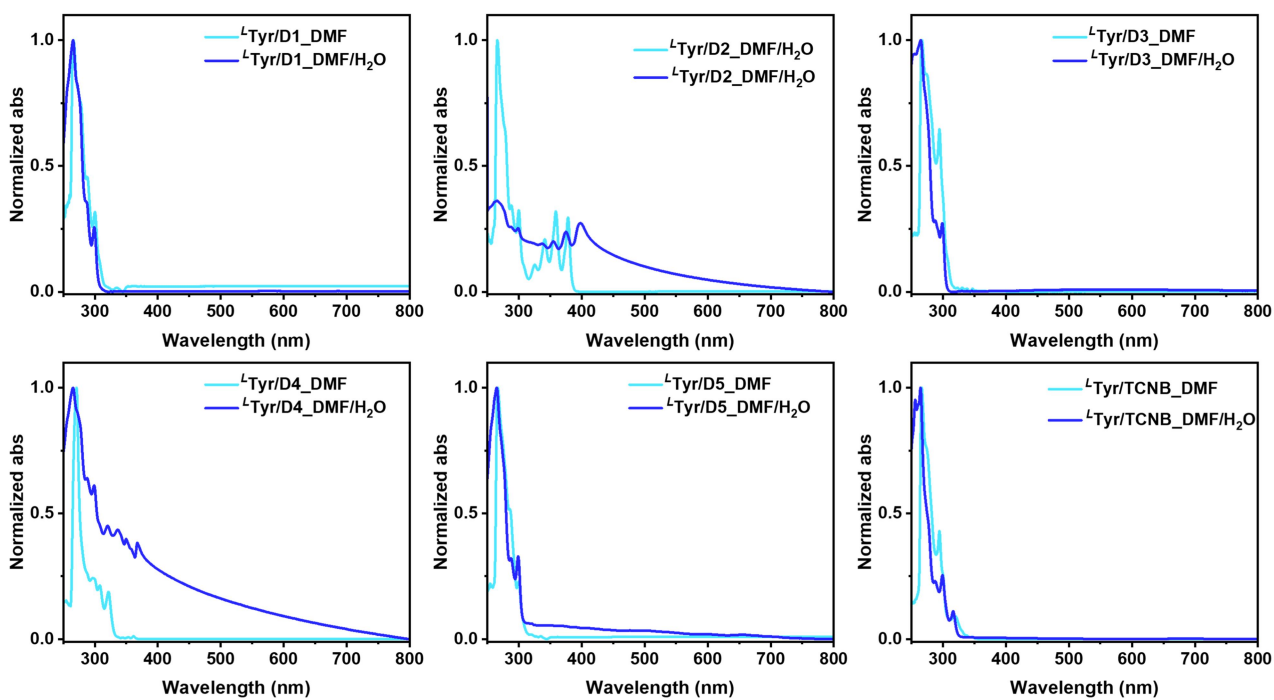

Fig. S5 Normalized UV-vis spectra of <sup>L</sup>Tyr/D1-5 and <sup>L</sup>Tyr/TCNB (5.6 mM:5.6 mM) in DMF and DMF/H<sub>2</sub>O (1/19, v/v).

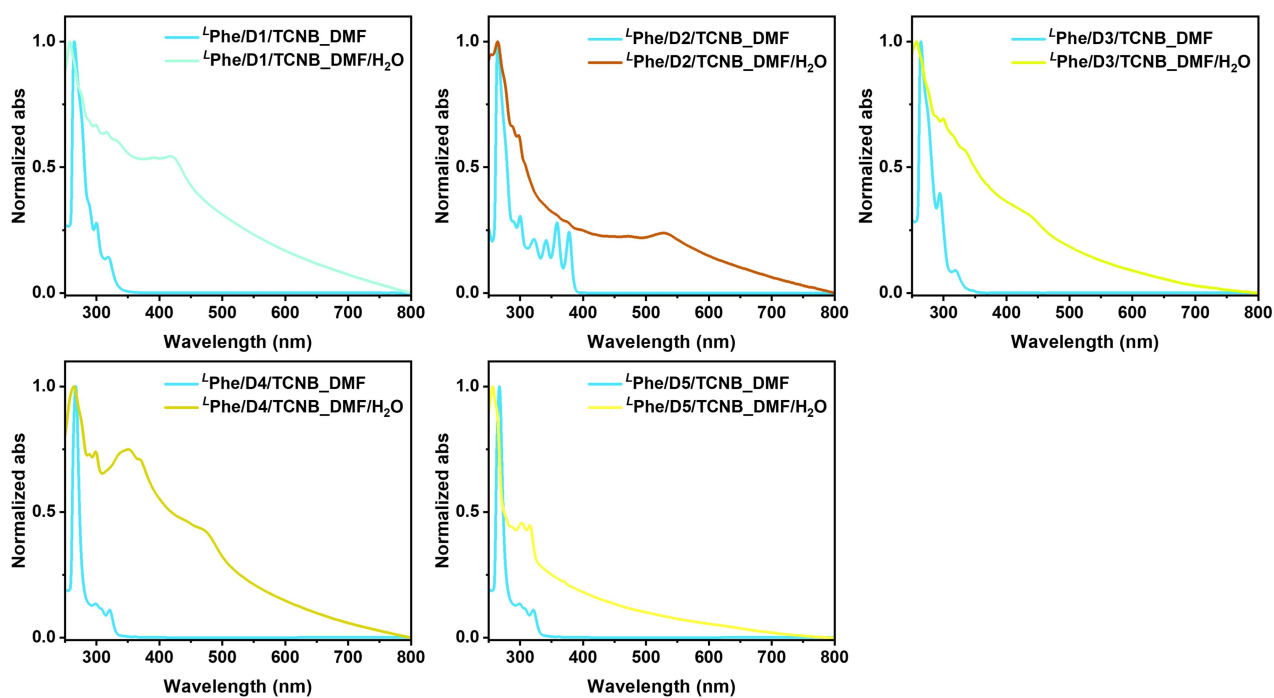

Fig. S6 Normalized UV-vis spectra of <sup>L</sup>Phe/D1-5/TCNB (5.6 mM:5.6 mM:5.6 mM) in DMF and DMF/H<sub>2</sub>O (1/19, v/v).

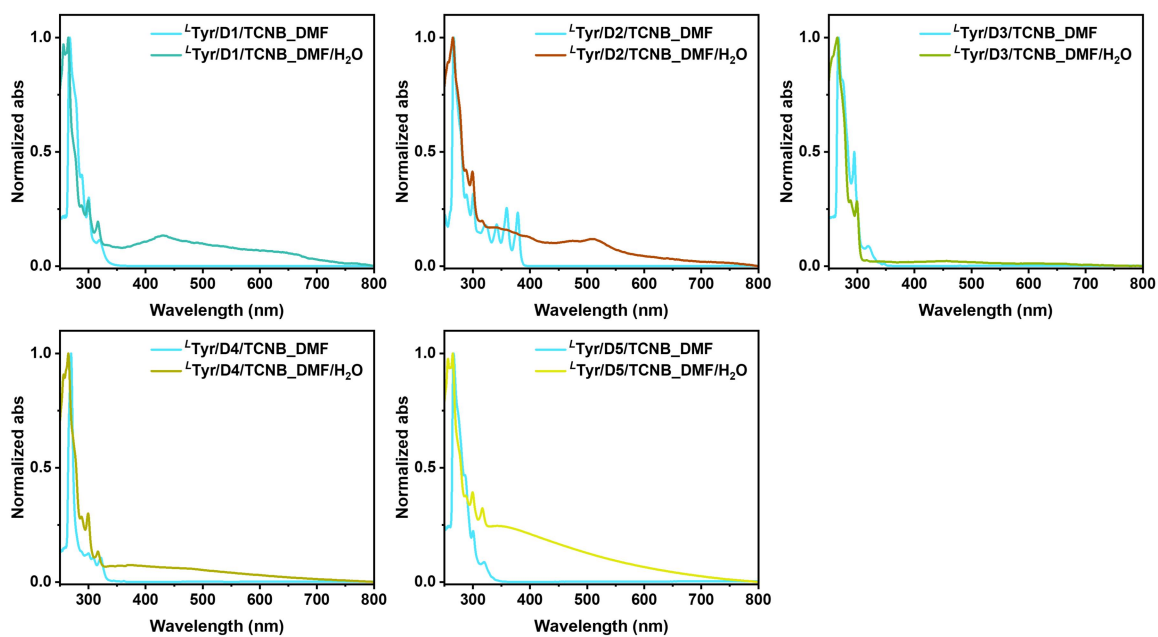

**Fig. S7** Normalized UV-vis spectra of  $L$ -Tyr/D1-5/TCNB (5.6 mM:5.6 mM:5.6 mM) in DMF and DMF/H<sub>2</sub>O (1/19, v/v).

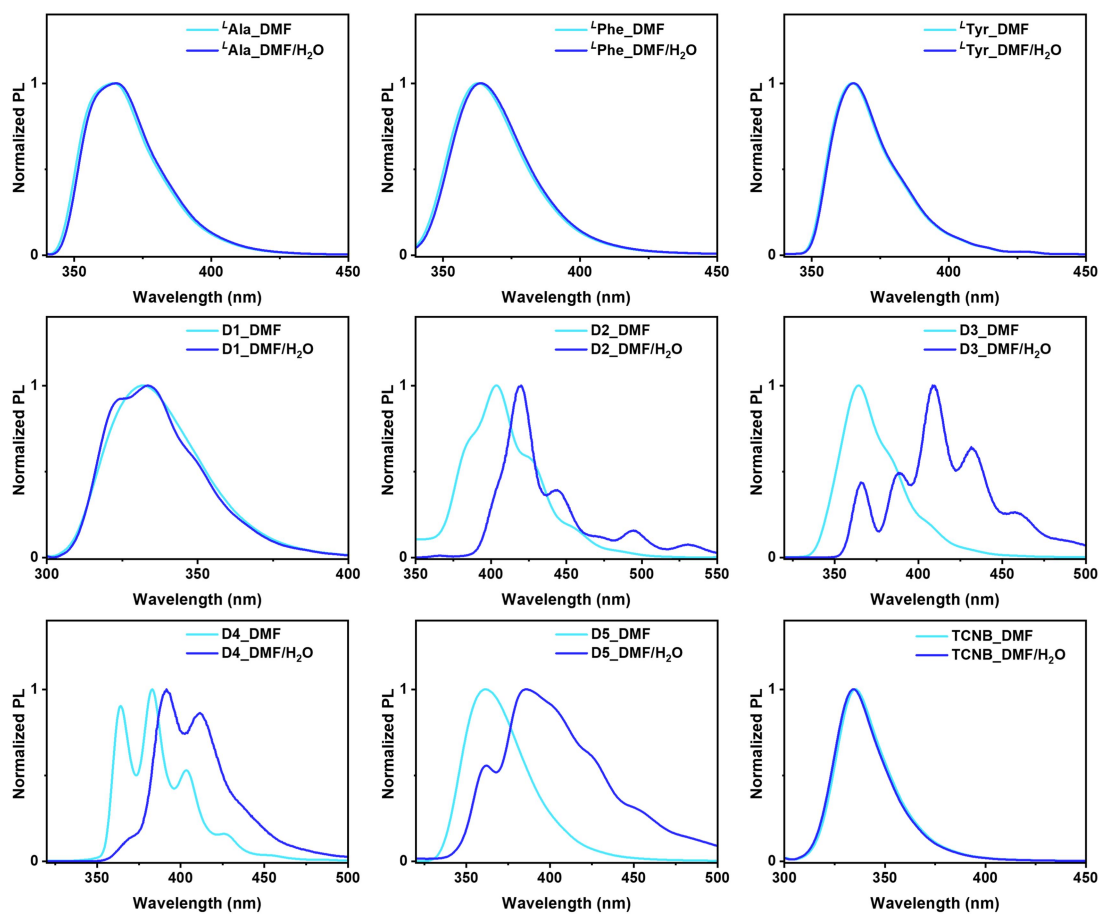

**Fig. S8** Normalized PL spectra of individual  $L$ -Ala,  $L$ -Phe,  $L$ -Tyr, D1-5 and TCNB (5.6 mM) in DMF ( $\lambda_{\text{ex}} = 280$  nm) and DMF/H<sub>2</sub>O ( $\lambda_{\text{ex}} = 280$  nm, 1/19, v/v).

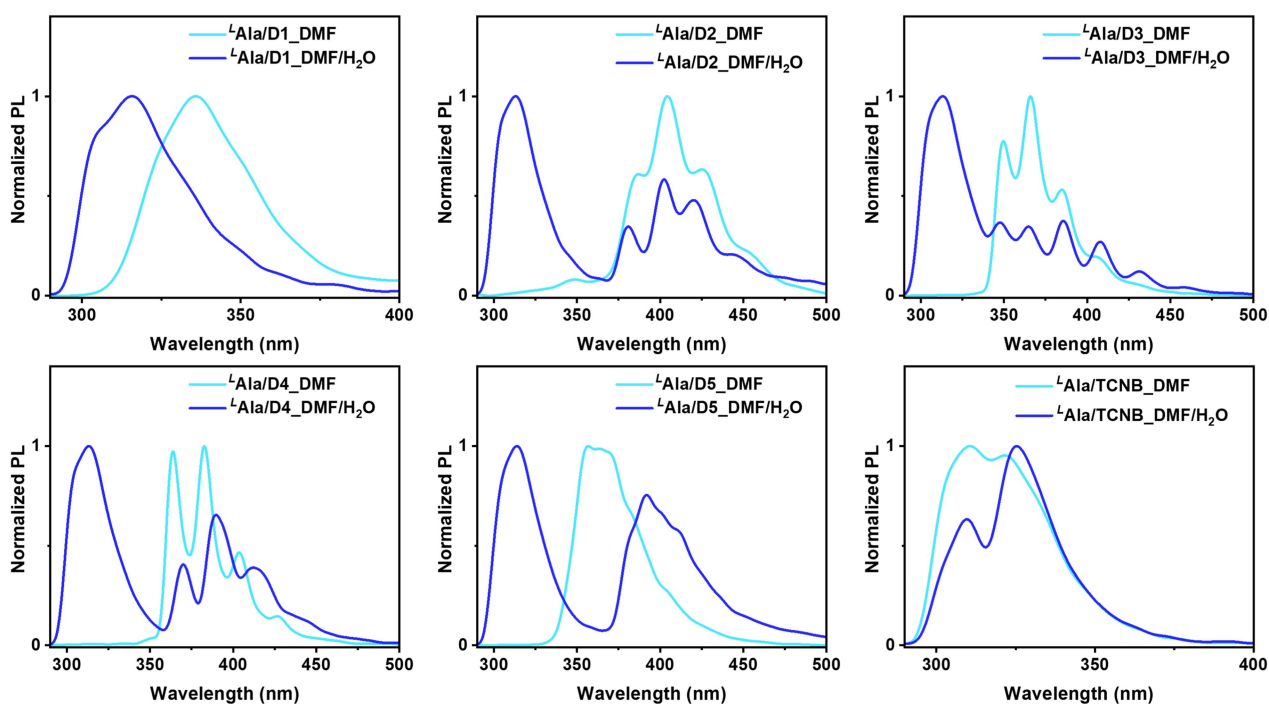

**Fig. S9** Normalized PL spectra of  $^L\text{Ala/D1-5}$  and  $^L\text{Ala/TCNB}$  (5.6 mM:5.6 mM) in DMF ( $\lambda_{\text{ex}} = 280$  nm) and DMF/H<sub>2</sub>O ( $\lambda_{\text{ex}} = 280$  nm, 1/19, v/v).

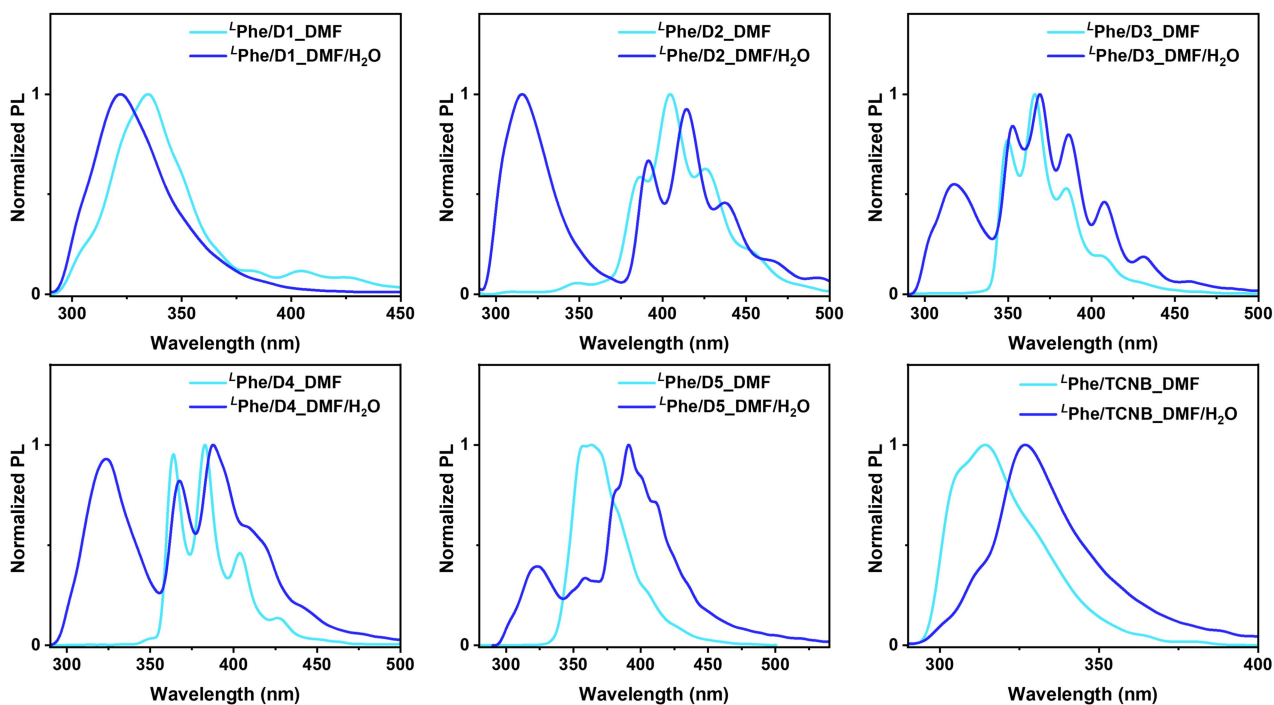

**Fig. S10** Normalized PL spectra of  $^L\text{Phe/D1-5}$  and  $^L\text{Phe/TCNB}$  (5.6 mM:5.6 mM) in DMF ( $\lambda_{\text{ex}} = 280$  nm) and DMF/H<sub>2</sub>O ( $\lambda_{\text{ex}} = 280$  nm, 1/19, v/v).



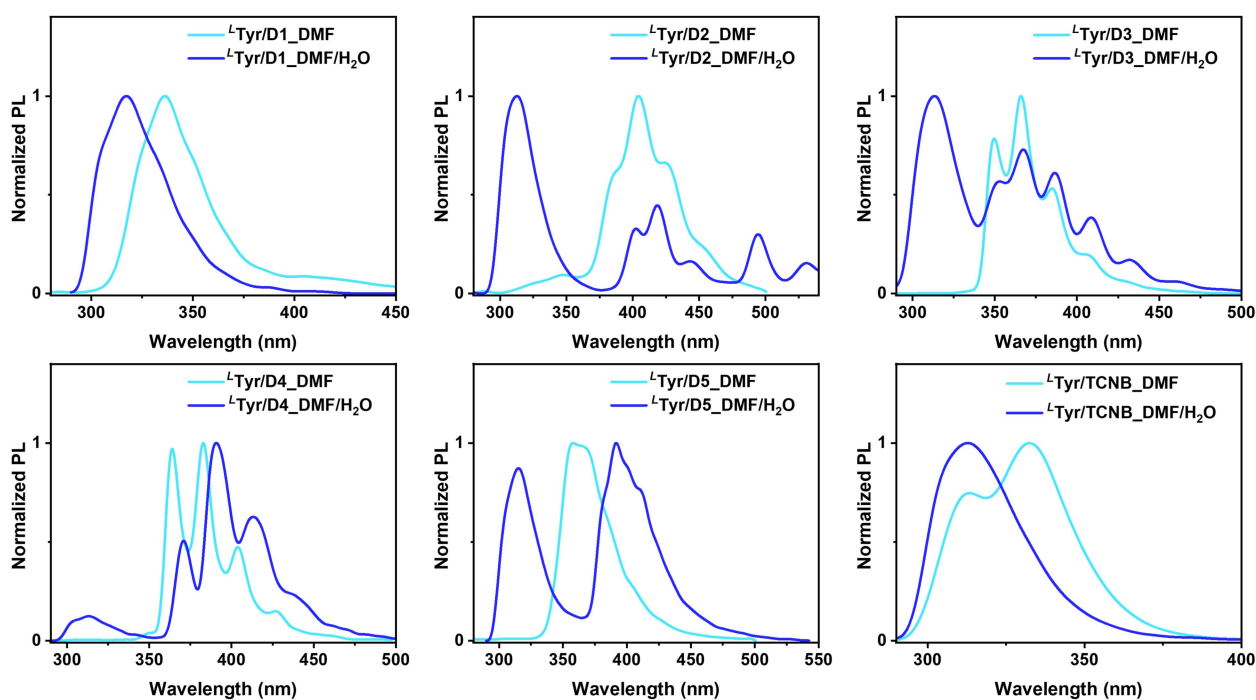

**Fig. S11** Normalized PL spectra of  $L$ -Tyr/D1-5 and  $L$ -Tyr/TCNB (5.6 mM:5.6 mM) in DMF ( $\lambda_{\text{ex}} = 280$  nm) and DMF/H<sub>2</sub>O ( $\lambda_{\text{ex}} = 280$  nm, 1/19, v/v).

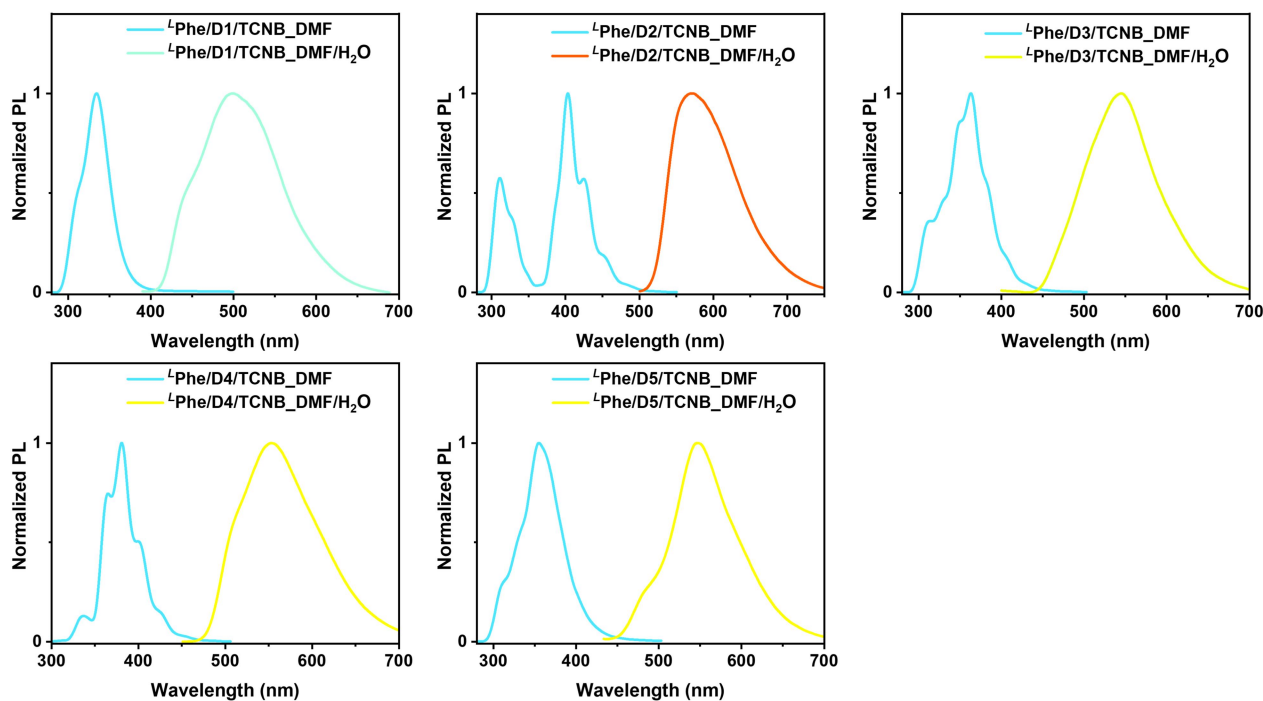

**Fig. S12** Normalized PL spectra of  $L$ -Phe/D1-5/TCNB (5.6 mM:5.6 mM:5.6 mM) in DMF ( $\lambda_{\text{ex}} = 280$  nm) and DMF/H<sub>2</sub>O ( $\lambda_{\text{ex}} = 360$  nm, 1/19, v/v).

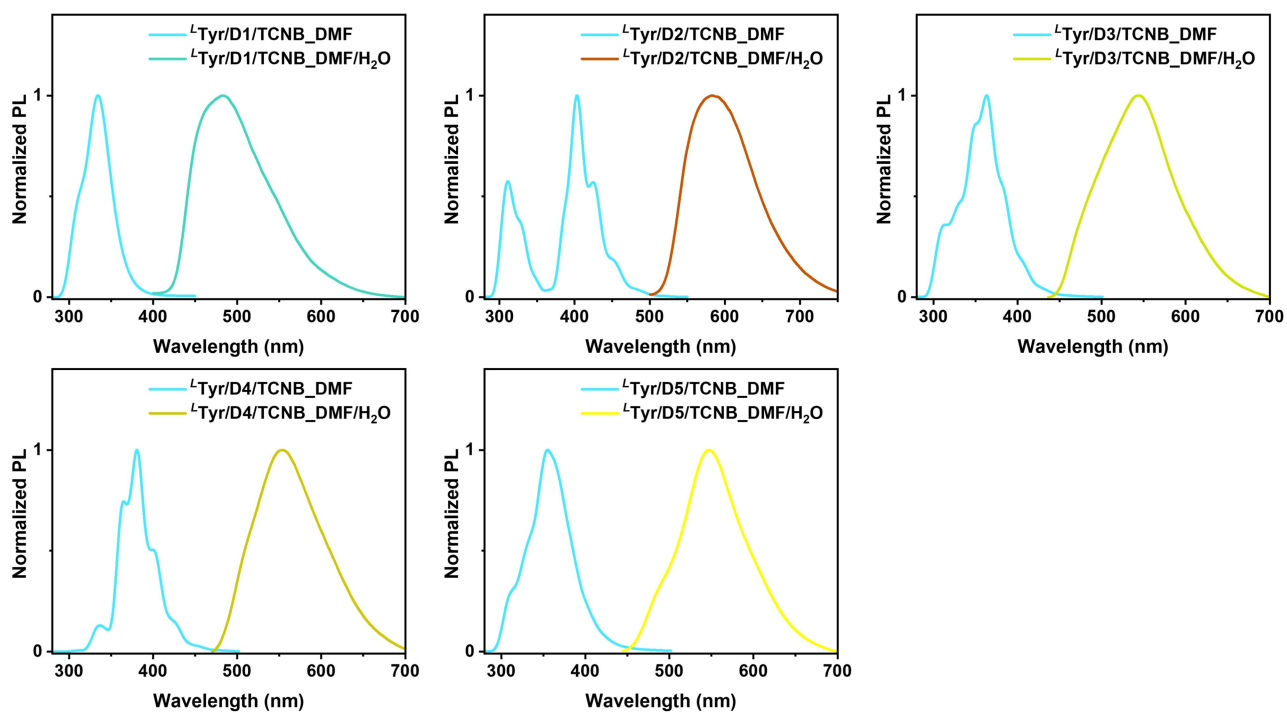

**Fig. S13** Normalized PL spectra of  $L$ -Tyr/D1-5/TCNB (5.6 mM:5.6 mM:5.6 mM) in DMF ( $\lambda_{\text{ex}} = 280$  nm) and DMF/H<sub>2</sub>O ( $\lambda_{\text{ex}} = 360$  nm, 1/19, v/v).

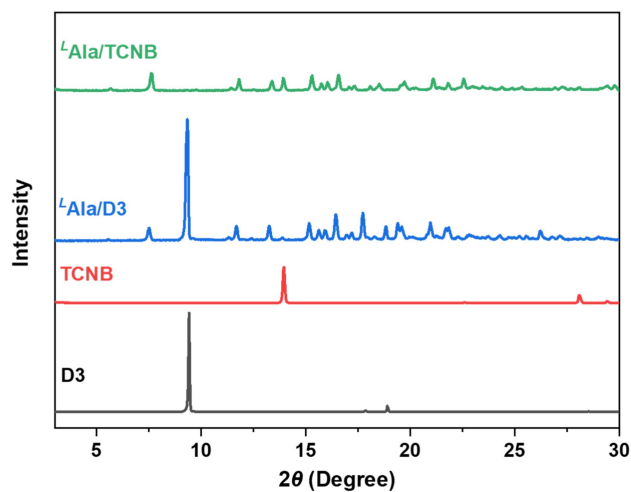

**Fig. S14** Powder XRD patterns of assemblies of D3 and TCNB (5.6 mM), and assemblies of  $L$ -Ala/D3 and  $L$ -Ala/TCNB (5.6 mM:5.6 mM) formed in DMF/H<sub>2</sub>O (1/19, v/v).

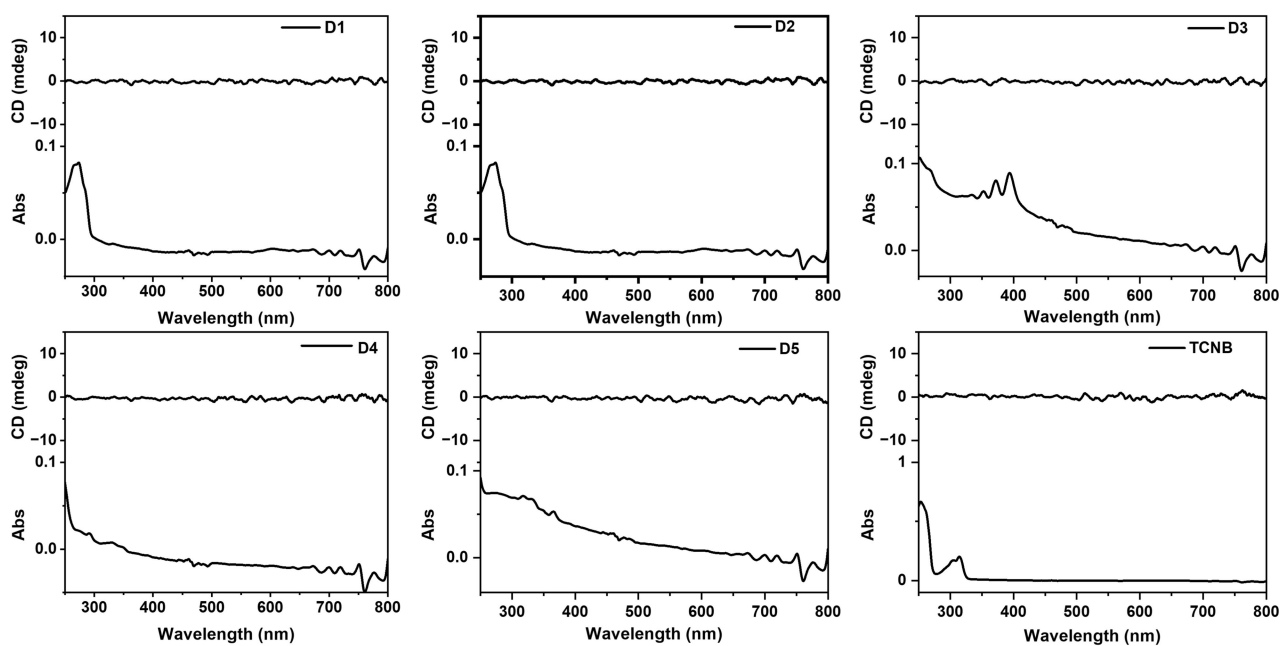

**Fig. S15** CD and UV-vis spectra of individual **D1-5** and **TCNB** (5.6 mM) assemblies formed in DMF/H<sub>2</sub>O (1/19, v/v)

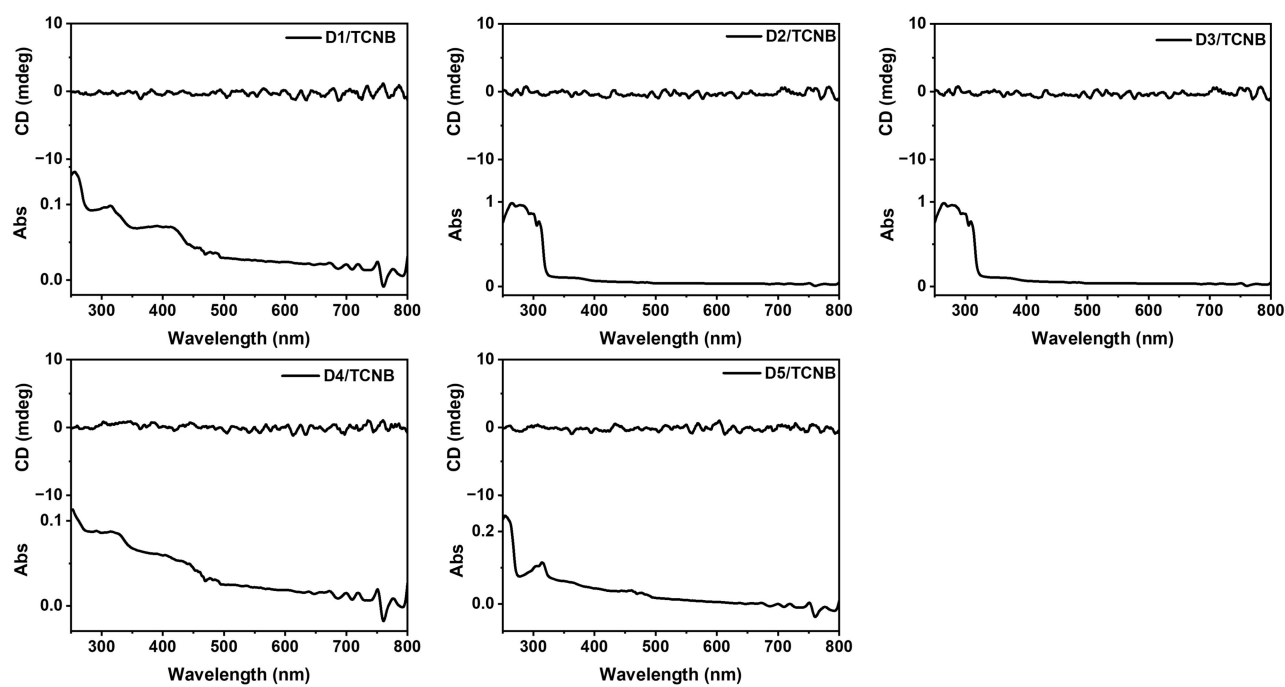

**Fig. S16** CD and UV-vis spectra of **D1-5/TCNB** (5.6 mM:5.6 mM) assemblies formed in DMF/H<sub>2</sub>O (1/19, v/v).

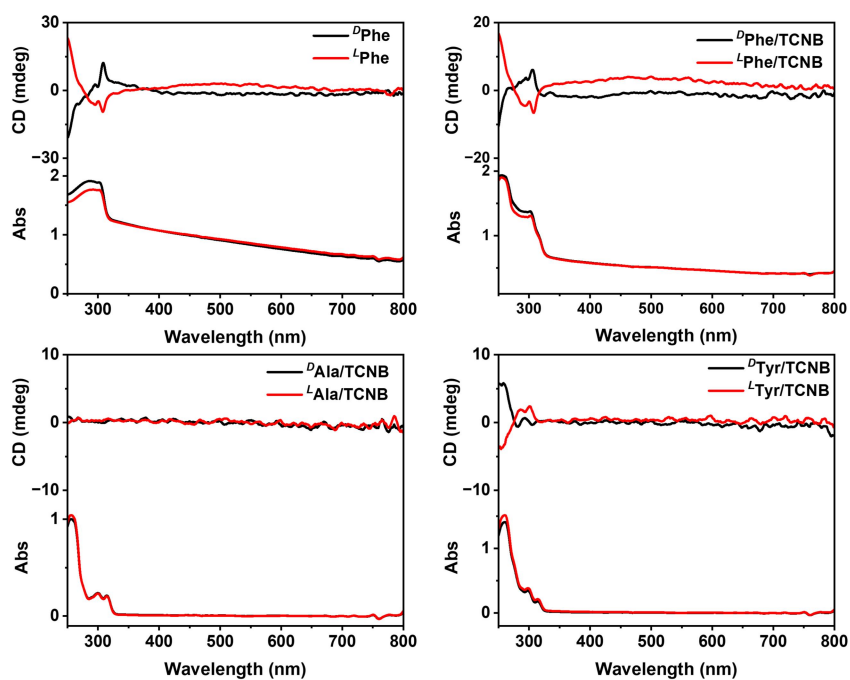

**Fig. S17** CD and UV-vis spectra of individual  $L$  or  $D$ -Phe (5.6 mM) assemblies and  $L$  or  $D$ -Phe/TCNB,  $L$  or  $D$ -Ala/TCNB and  $L$  or  $D$ -Tyr/TCNB (5.6 mM:5.6 mM) assemblies formed in DMF/H<sub>2</sub>O (1/19, v/v).

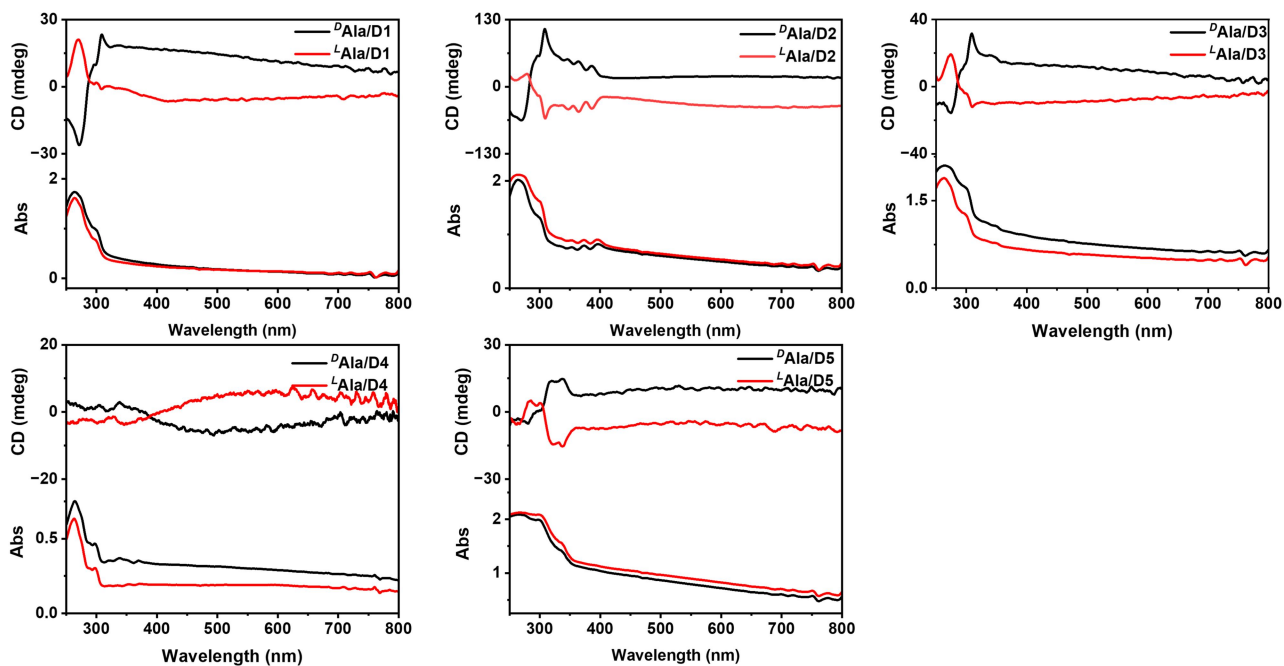

**Fig. S18** CD and UV-vis spectra of  $L$  or  $D$ -Ala/D1-5 (5.6 mM:5.6 mM) assemblies formed in DMF/H<sub>2</sub>O (1/19, v/v).

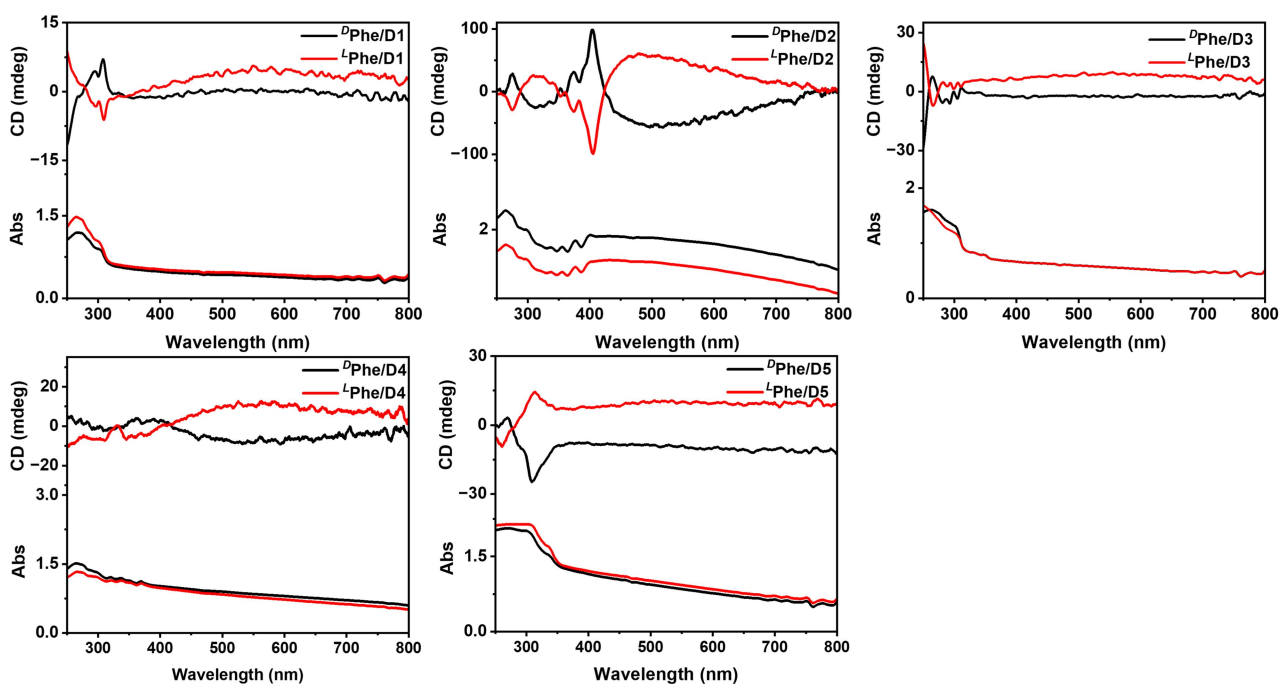

Fig. S19 CD and UV-vis spectra of  $L$  or  $D$  Phe/D1-5 (5.6 mM:5.6 mM) assemblies formed in DMF/H<sub>2</sub>O (1/19, v/v).

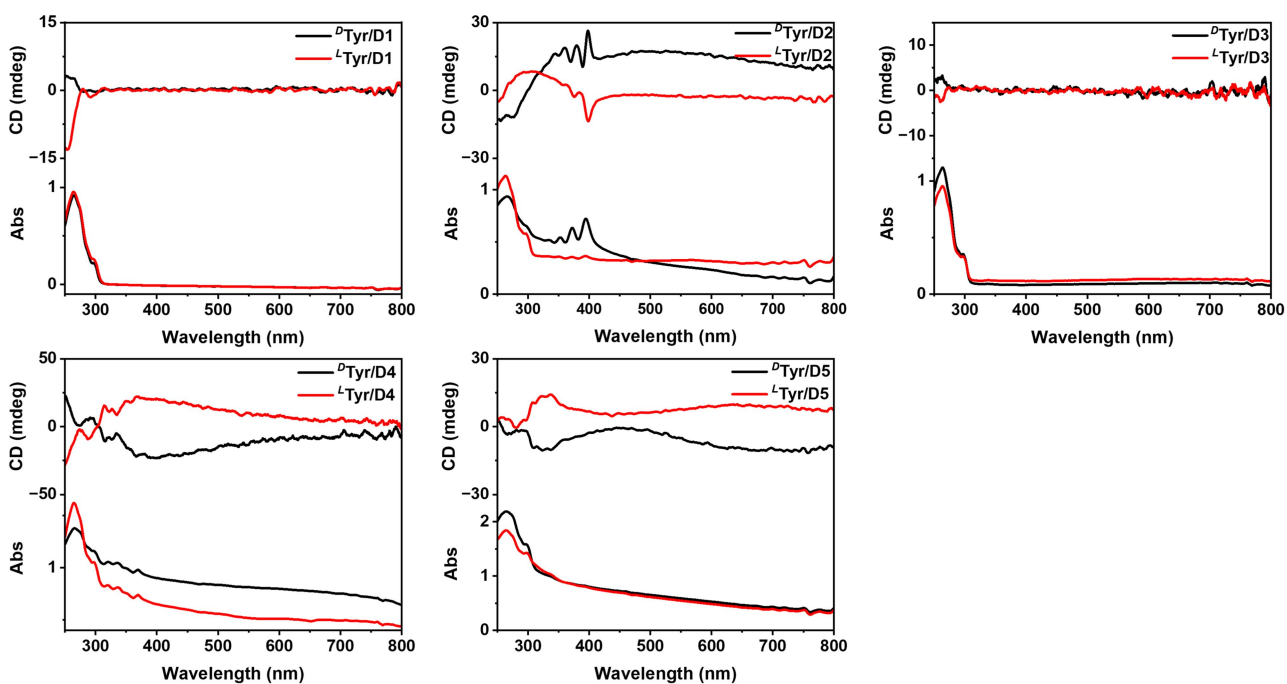

Fig. S20 CD and UV-vis spectra of  $L$  or  $D$  Tyr/D1-5 (5.6mM:5.6 mM) assemblies formed in DMF/H<sub>2</sub>O (1/19, v/v).

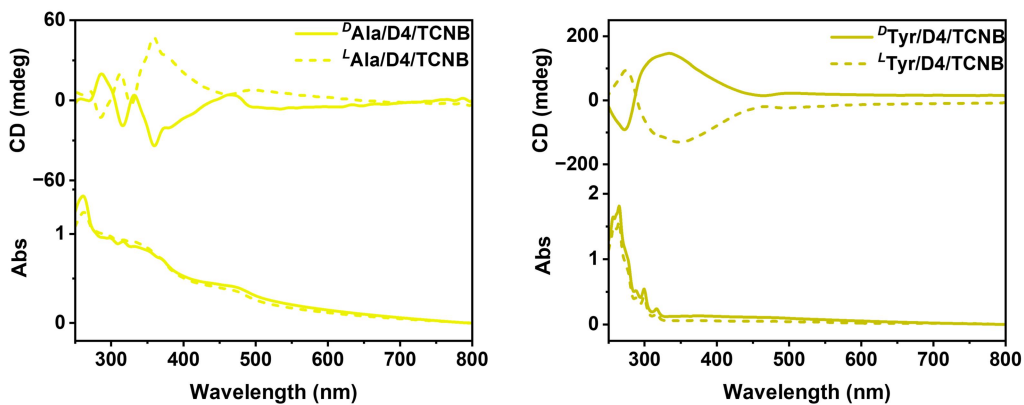

**Fig. S21** CD and UV-vis spectra of  $L$  or  $D$ -Ala/D4/TCNB and  $L$  or  $D$ -Tyr/D4/TCNB (5.6 mM:5.6 mM:5.6 mM) assemblies formed in DMF/H<sub>2</sub>O (1/19, v/v).

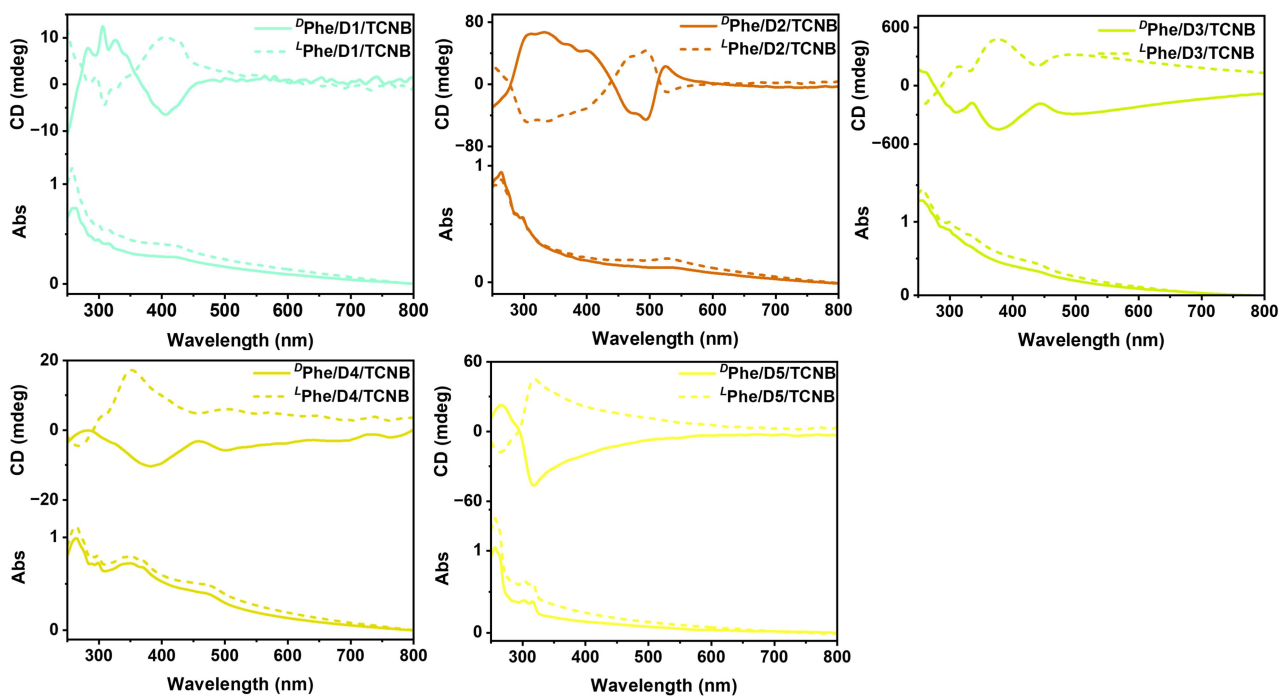

**Fig. S22** CD and UV-vis spectra of  $L$  or  $D$ -Phe/D1-5/TCNB (5.6 mM:5.6 mM:5.6 mM) assemblies formed in DMF/H<sub>2</sub>O (1/19, v/v).

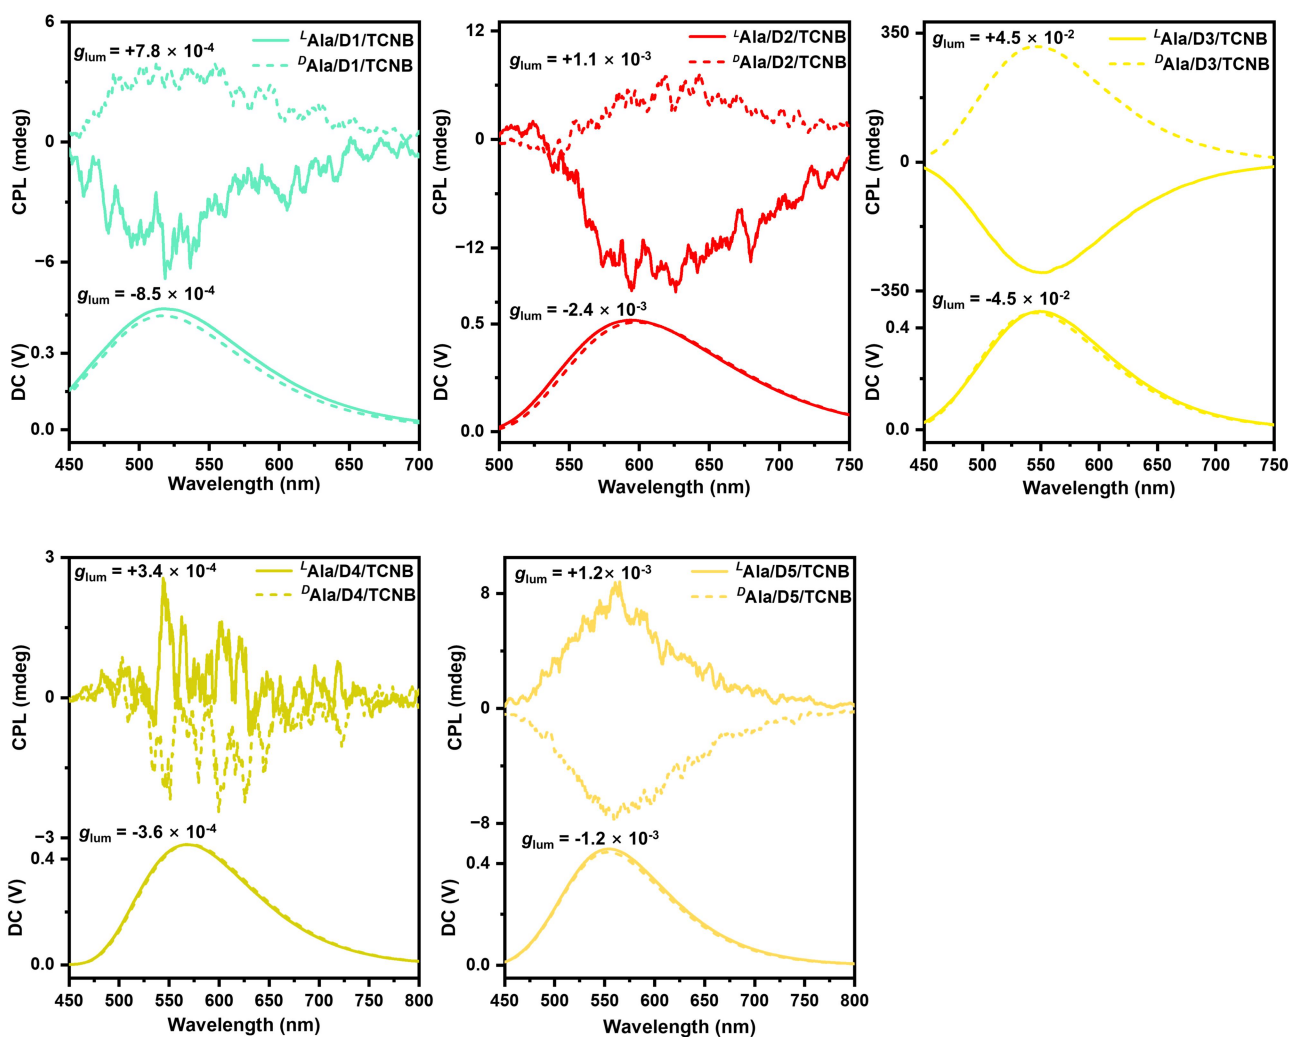

**Fig. S23** CPL spectra of  $L$  or  $D$ -Ala/D1-5/TCNB (5.6 mM:5.6 mM:5.6 mM) assemblies formed in DMF/H<sub>2</sub>O (1/19, v/v) excited by 360 nm UV light.

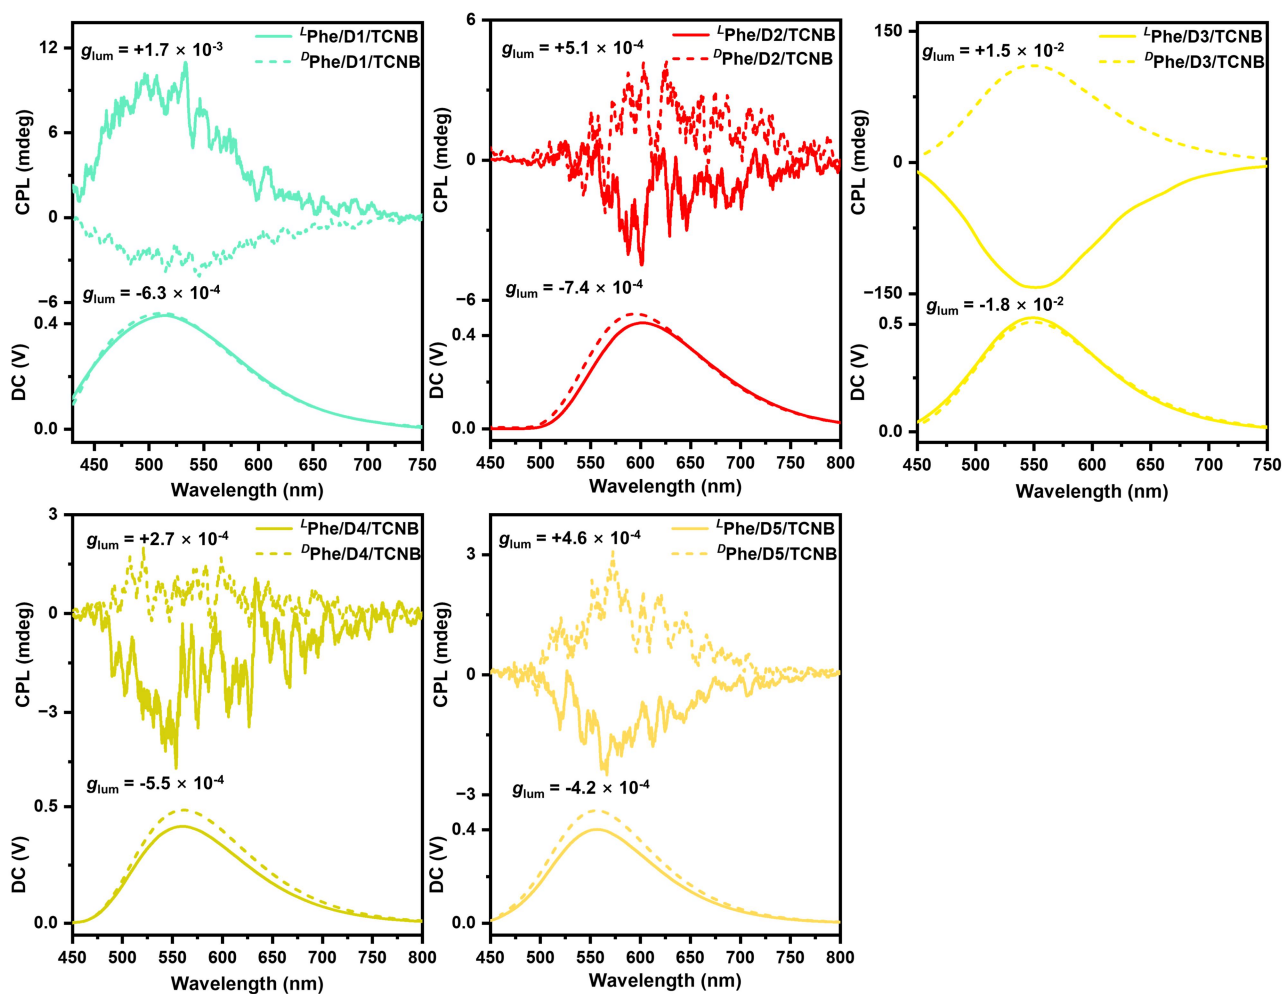

**Fig. S24** CPL spectra of  $L$  or  $D$  Phe/D1-5/TCNB (5.6 mM:5.6 mM:5.6 mM) assemblies formed in DMF/H<sub>2</sub>O (1/19, v/v) excited by 360 nm UV light.



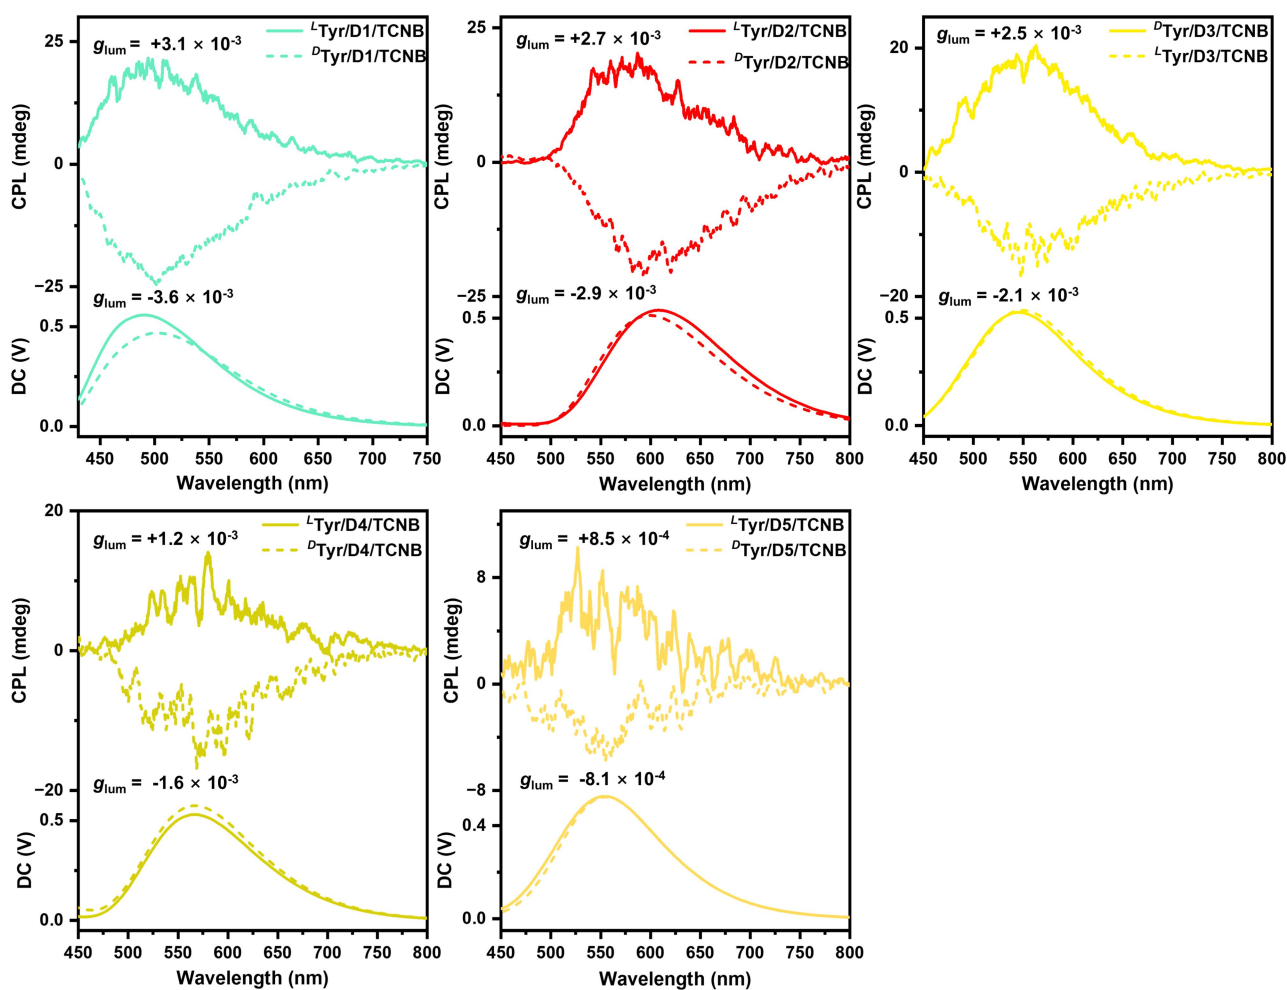

**Fig. S25** CPL spectra of  $L$  or  $D$ -Tyr/D1-5/TCNB (5.6 mM:5.6 mM:5.6 mM) assemblies formed in DMF/H<sub>2</sub>O (1/19, v/v) excited by 360 nm UV light.

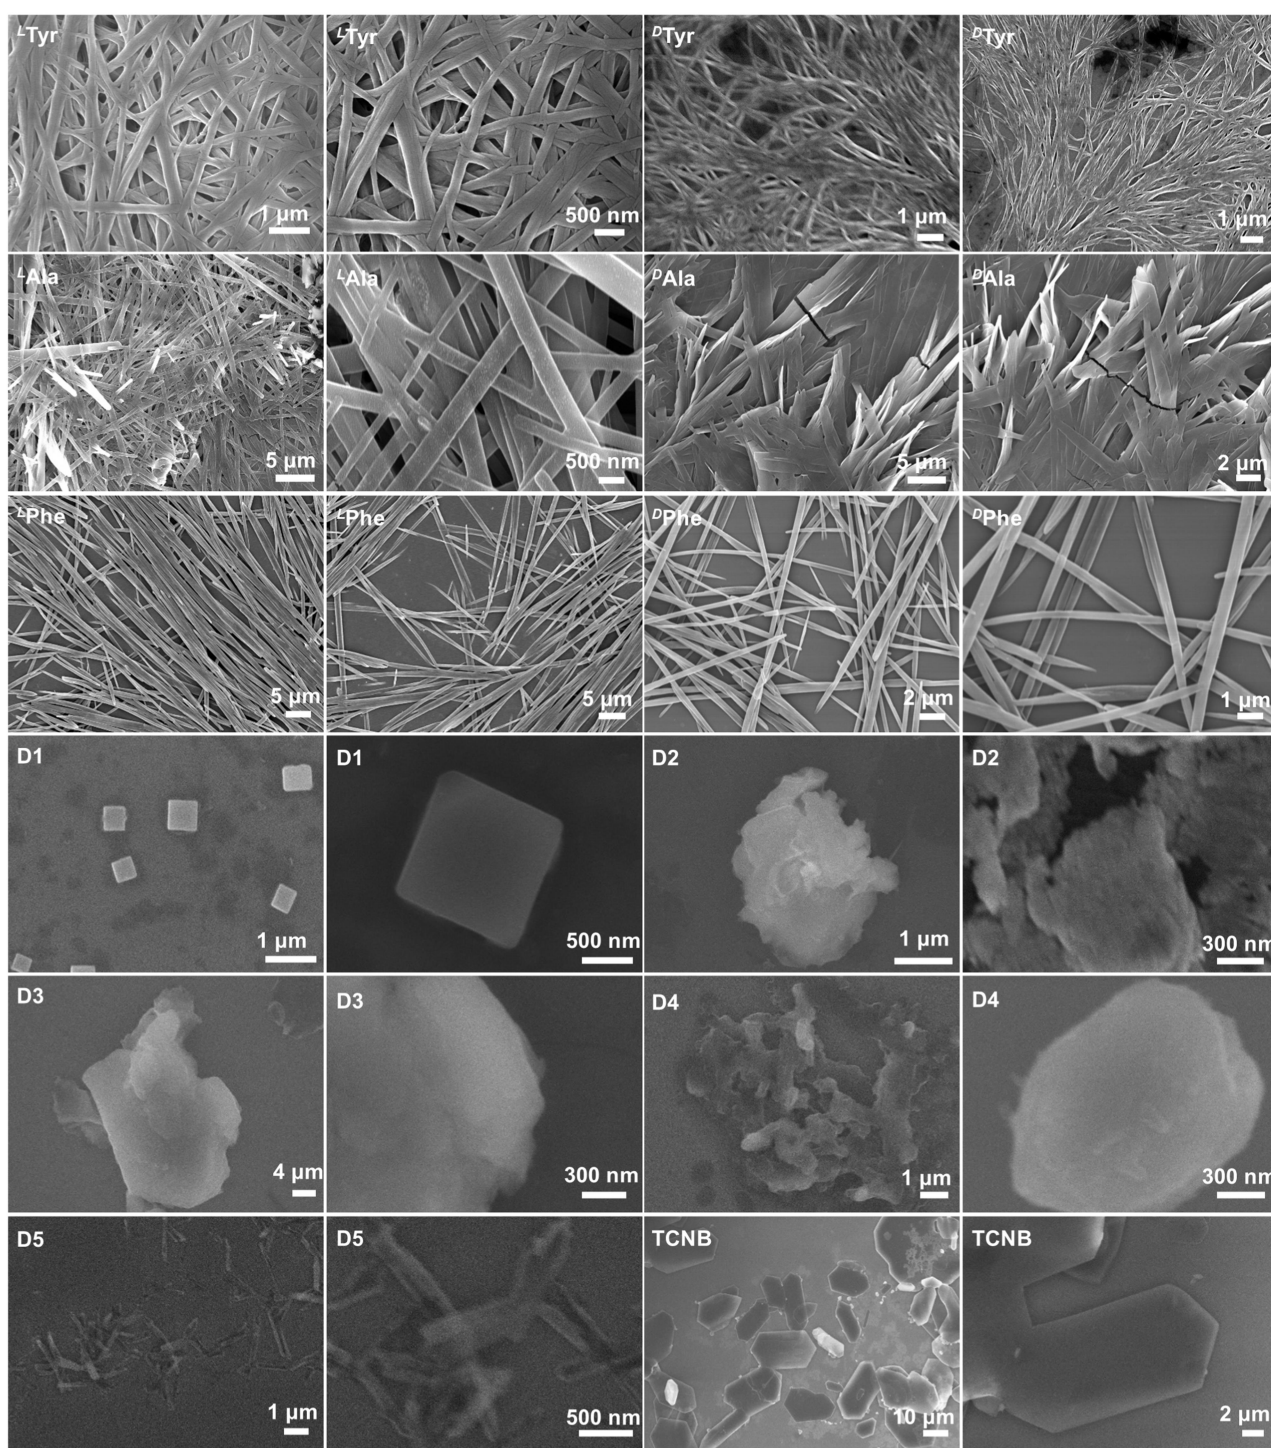

**Fig. S26** SEM images of individual  $L$  or  $D$ -Tyr,  $L$  or  $D$ -Ala,  $L$  or  $D$ -Phe, D1-5 and TCNB (5.6 mM) assemblies formed in DMF/H<sub>2</sub>O (1/19, v/v).

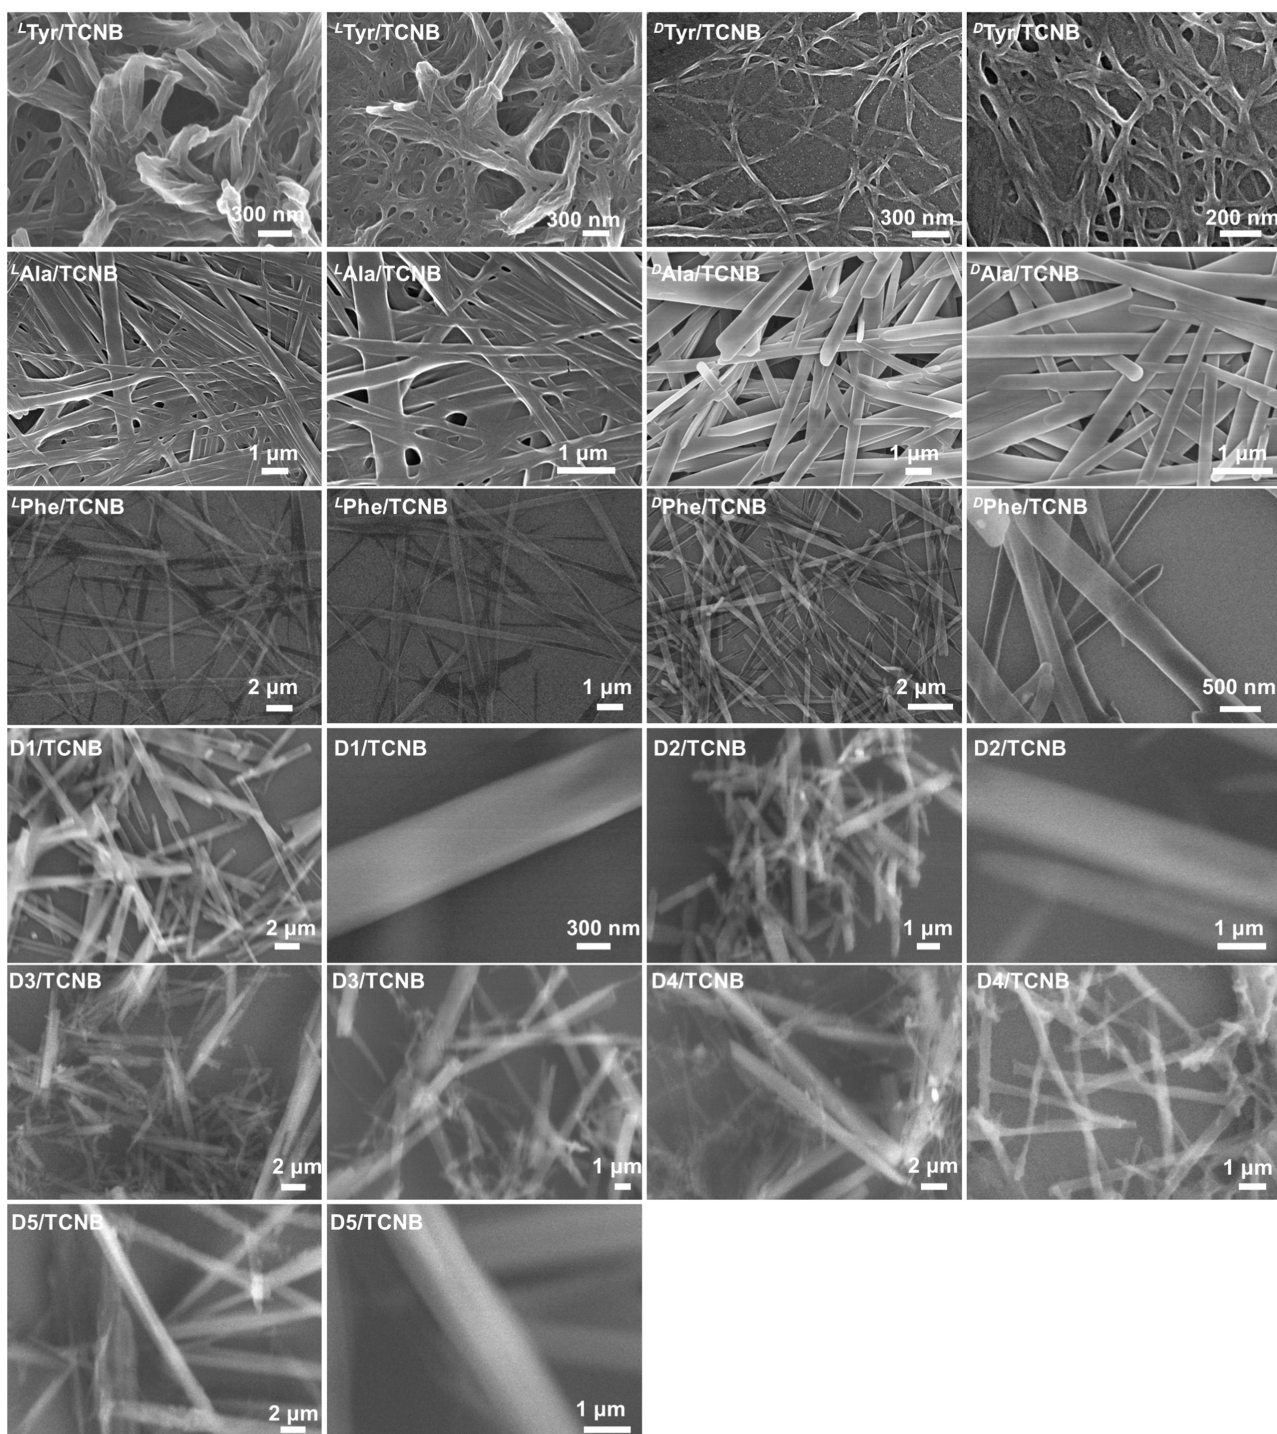

**Fig. S27** SEM images of assemblies of  $L$  or  $D$  **Ala/TCNB**,  $L$  or  $D$  **Phe/TCNB**,  $L$  or  $D$  **Tyr/TCNB** and **D1-5/TCNB** (5.6 mM:5.6 mM) formed in DMF/H<sub>2</sub>O (1/19, v/v).

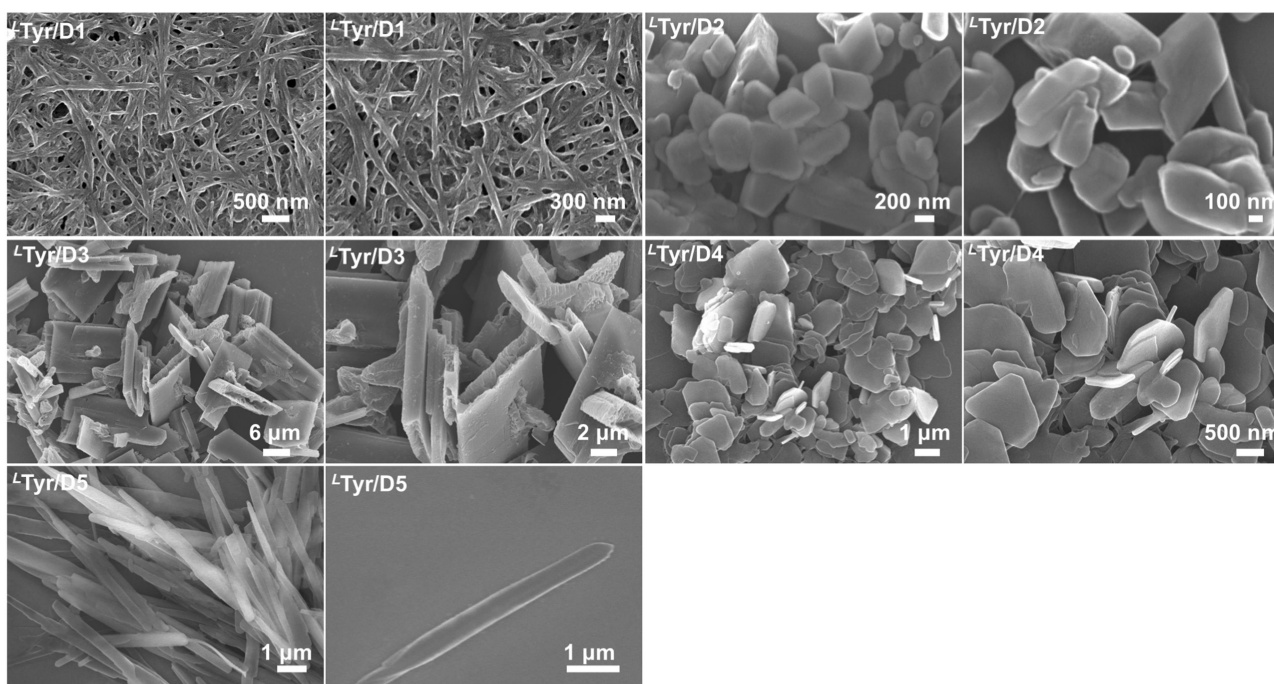

Fig. S28 SEM images of  $L$ -Tyr/D1-5 (5.6 mM:5.6 mM) assemblies formed in DMF/H<sub>2</sub>O (1/19, v/v).

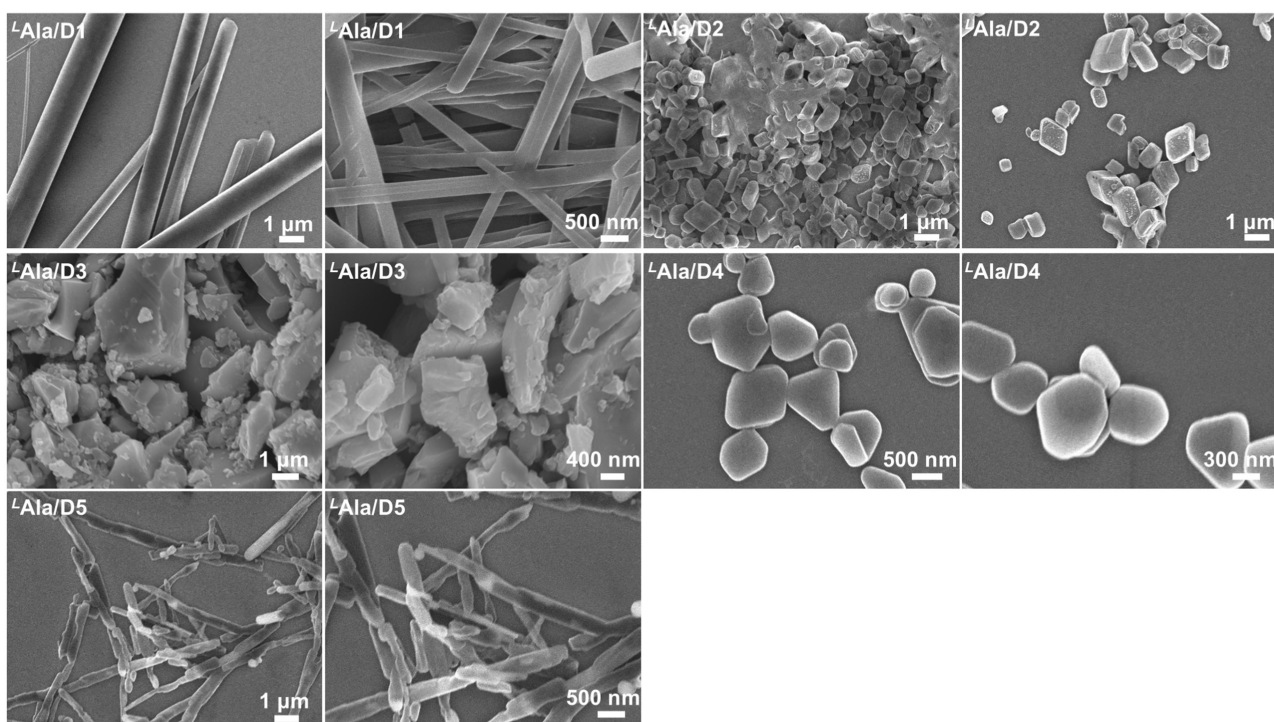

Fig. S29 SEM images of  $L$ -Ala/D1-5 (5.6 mM:5.6 mM) assemblies formed in DMF/H<sub>2</sub>O (1/19, v/v).

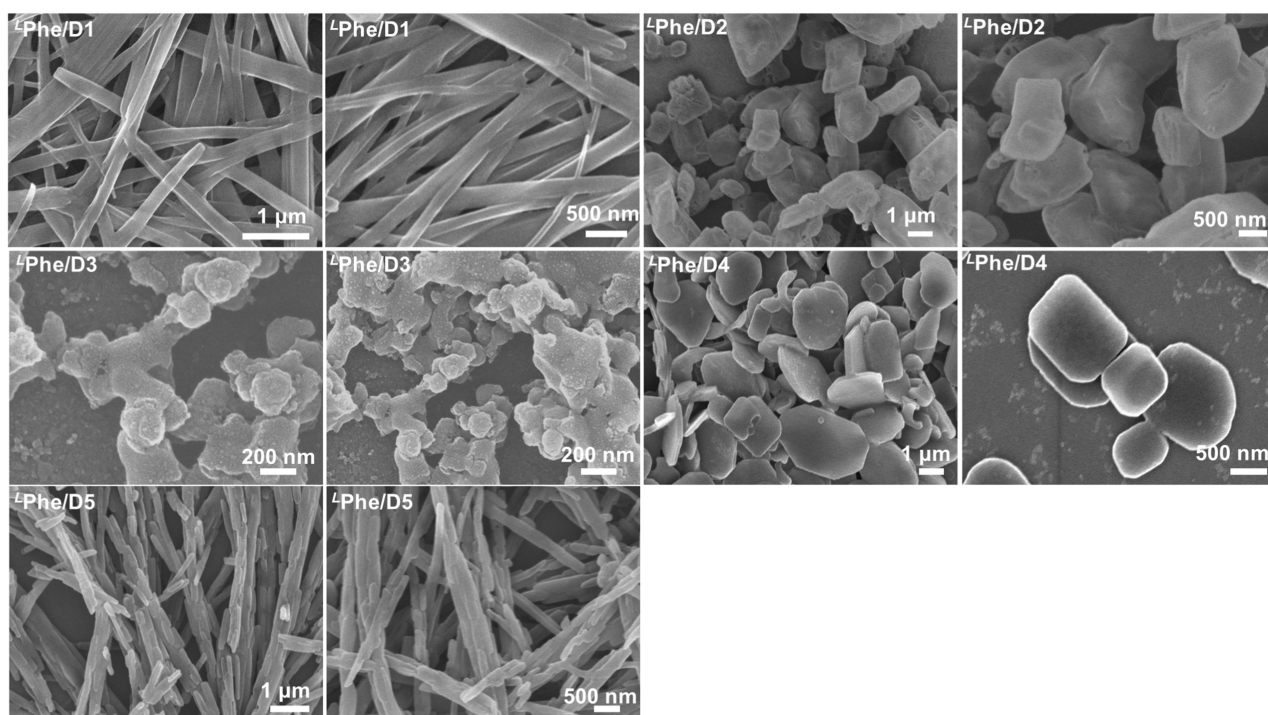

**Fig. S30** SEM images of  $^L\text{Phe/D1-5}$  (5.6 mM:5.6 mM) assemblies formed in DMF/H<sub>2</sub>O (1/19, v/v).

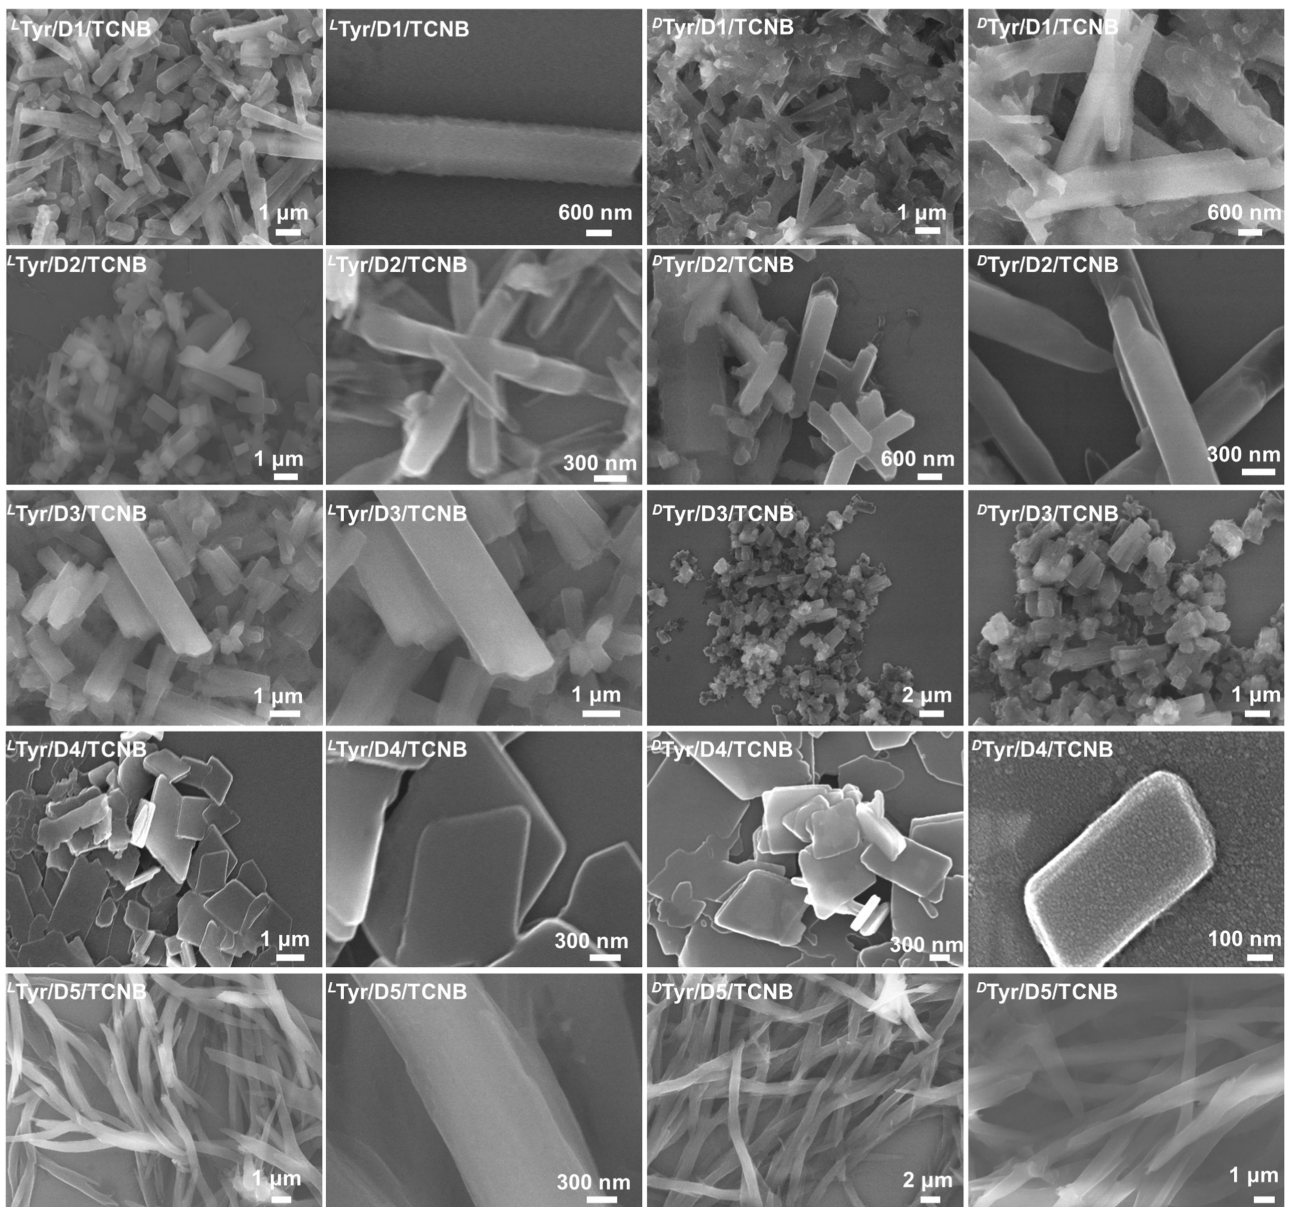

**Fig. S31** SEM images of ternary assemblies of  $L$  or  $D$ -Tyr/D1-5/TCNB (5.6 mM:5.6 mM:5.6 mM) formed in DMF/H<sub>2</sub>O (1/19, v/v).

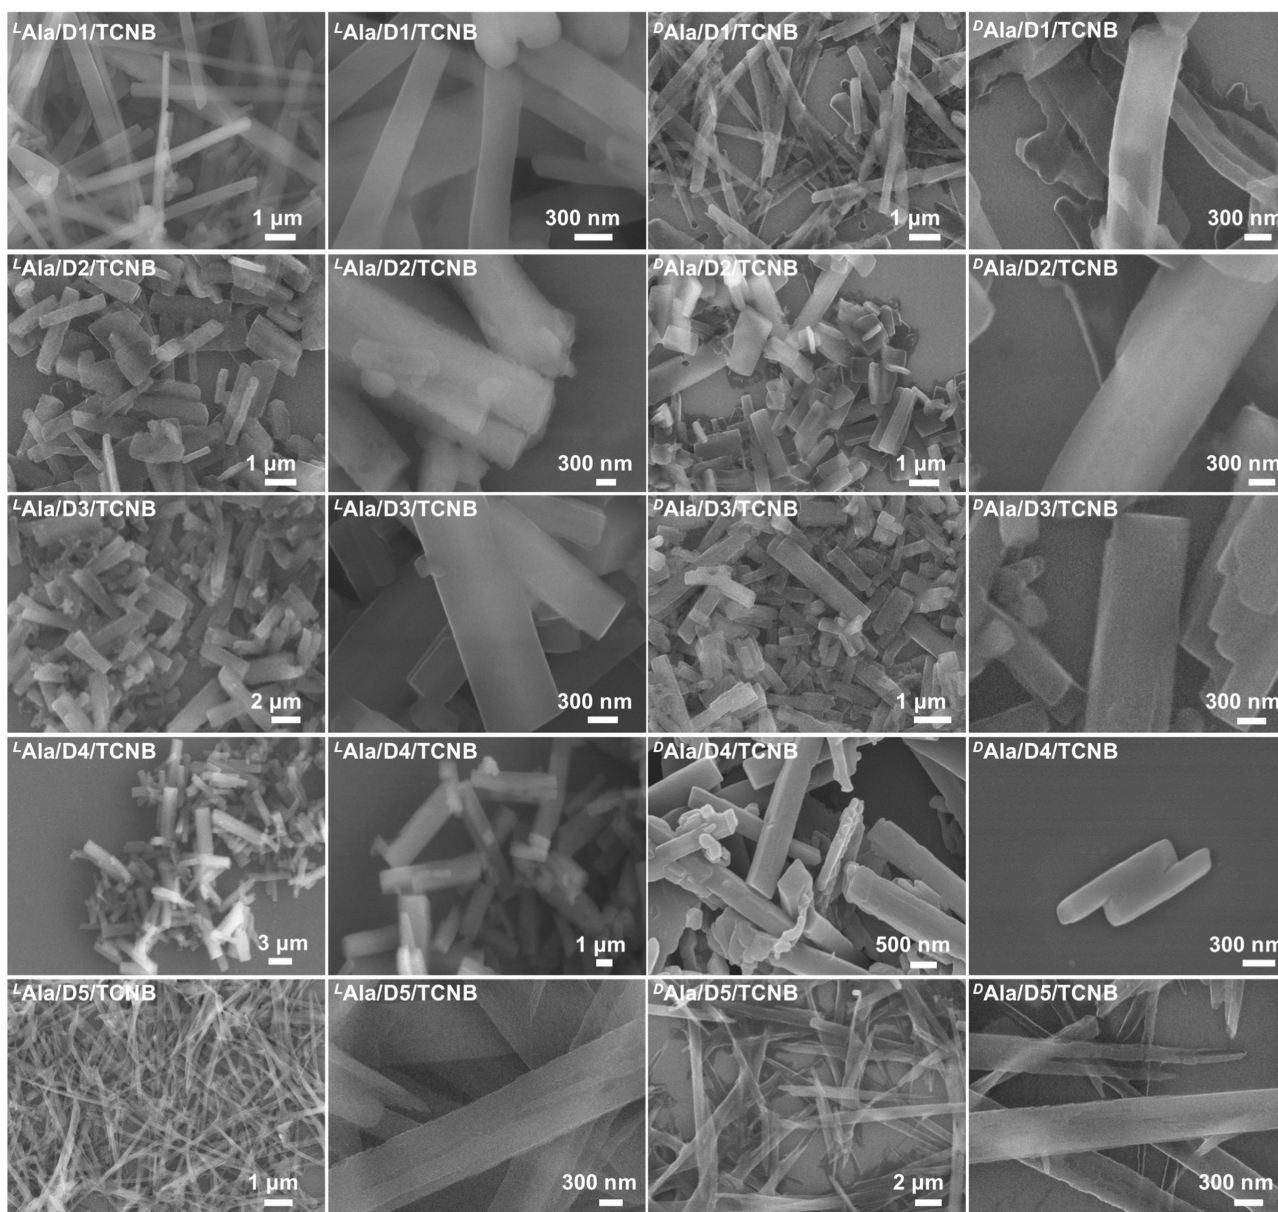

**Fig. S32** SEM images of ternary assemblies of  $L$  or  $D$ -Ala/D1-5/TCNB (5.6 mM:5.6 mM:5.6 mM) formed in DMF/H<sub>2</sub>O (1/19, v/v).

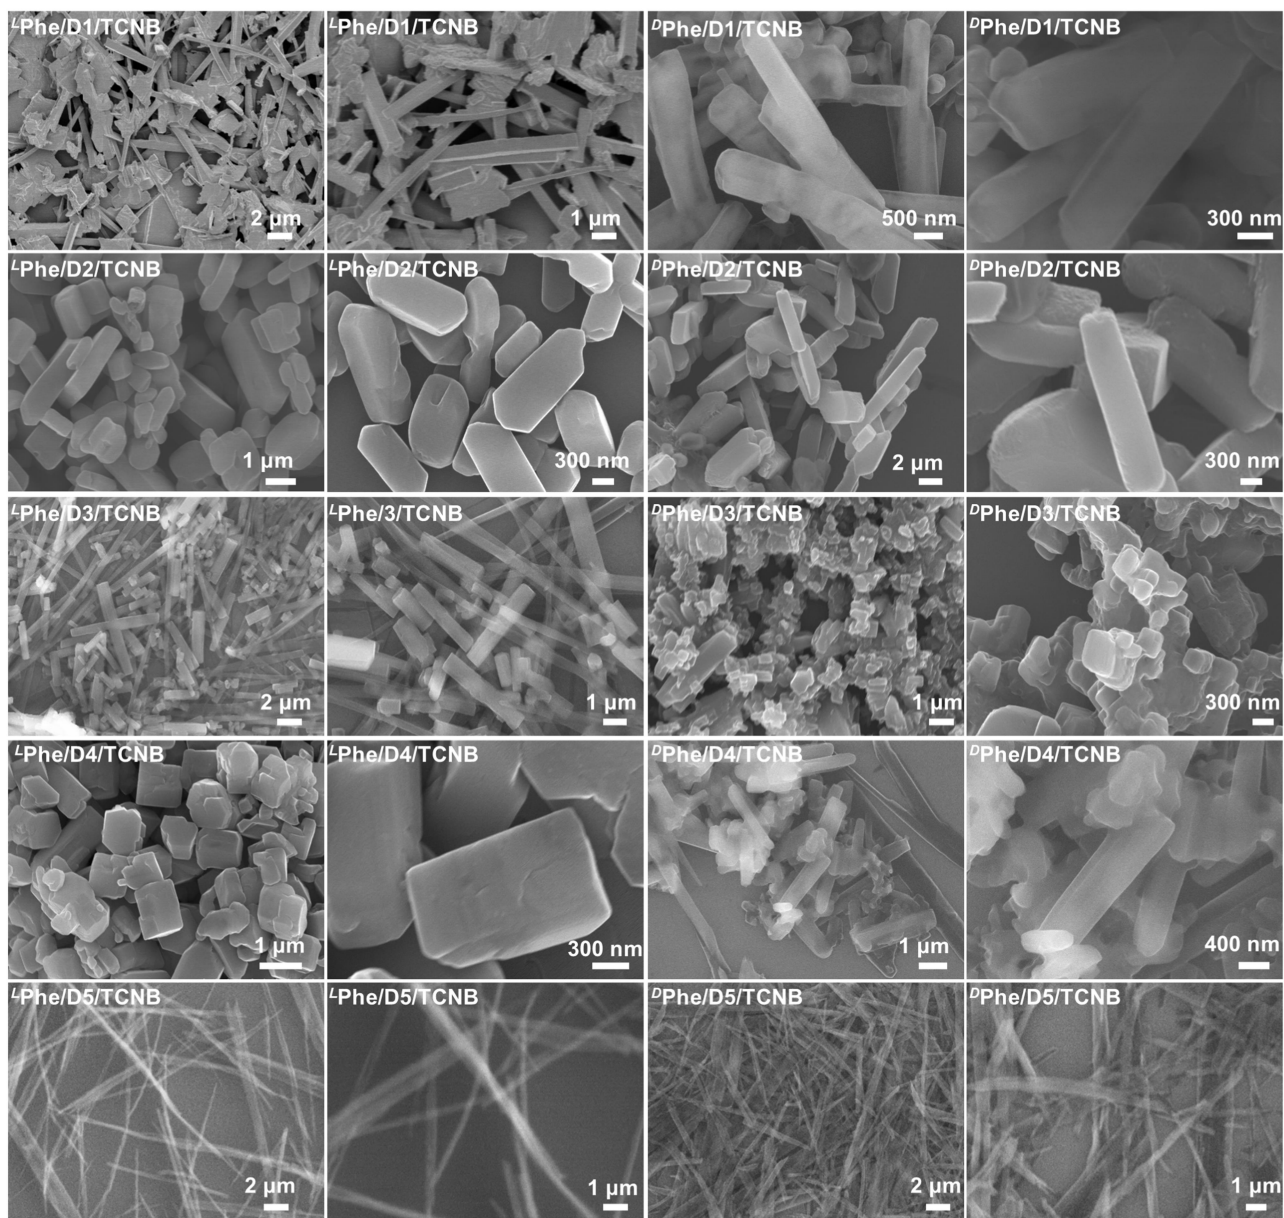

**Fig. S33** SEM images of ternary assemblies of <sup>L</sup> or <sup>D</sup>Phe/D1-5/TCNB (5.6 mM:5.6 mM:5.6 mM) formed in DMF/H<sub>2</sub>O (1/19, v/v).



**Tab. S1** Diameters of the supramolecular nano- or micro-structures obtained in different assemblies of <sup>L or D</sup>Tyr, <sup>L or D</sup>Ala, <sup>L or D</sup>Phe, <sup>L or D</sup>Tyr/TCNB, <sup>L or D</sup>Ala/TCNB, <sup>L or D</sup>Phe/TCNB, D1-5/TCNB, <sup>L</sup>Tyr/D1, <sup>L</sup>Tyr/D5, <sup>L</sup>Ala/D1, <sup>L</sup>Ala/D5, <sup>L</sup>Phe/D1, <sup>L</sup>Phe/D5, <sup>L or D</sup>Tyr/D1-5/TCNB, <sup>L or D</sup>Ala/D1-5/TCNB, and <sup>L or D</sup>Phe/D1-5/TCNB.

| Sample                   | Diameter/nm | Sample                   | Diameter/nm |
|--------------------------|-------------|--------------------------|-------------|
| <sup>L</sup> Tyr         | 230         | <sup>L</sup> Tyr/D3/TCNB | 750-910     |
| <sup>D</sup> Tyr         | 230         | <sup>D</sup> Tyr/D3/TCNB | 670-920     |
| <sup>L</sup> Ala         | 690         | <sup>L</sup> Tyr/D4/TCNB | 1070-1730   |
| <sup>D</sup> Ala         | 690         | <sup>D</sup> Tyr/D4/TCNB | 850-1740    |
| <sup>L</sup> Phe         | 410         | <sup>L</sup> Tyr/D5/TCNB | 940-1160    |
| <sup>D</sup> Phe         | 410         | <sup>D</sup> Tyr/D5/TCNB | 960-1100    |
| <sup>L</sup> Tyr/TCNB    | 45          | <sup>L</sup> Ala/D1/TCNB | 260-690     |
| <sup>D</sup> Tyr/TCNB    | 50          | <sup>D</sup> Ala/D1/TCNB | 230-620     |
| <sup>L</sup> Ala/TCNB    | 400         | <sup>L</sup> Ala/D2/TCNB | 310-760     |
| <sup>D</sup> Ala/TCNB    | 400         | <sup>D</sup> Ala/D2/TCNB | 350-630     |
| <sup>L</sup> Phe/TCNB    | 350         | <sup>L</sup> Ala/D3/TCNB | 540-910     |
| <sup>D</sup> Phe/TCNB    | 380         | <sup>D</sup> Ala/D3/TCNB | 320-770     |
| D1/TCNB                  | 570         | <sup>L</sup> Ala/D4/TCNB | 370-960     |
| D2/TCNB                  | 360-780     | <sup>D</sup> Ala/D4/TCNB | 410-680     |
| D3/TCNB                  | 340-890     | <sup>L</sup> Ala/D5/TCNB | 450-870     |
| D4/TCNB                  | 470-790     | <sup>D</sup> Ala/D5/TCNB | 550-920     |
| D5/TCNB                  | 460-820     | <sup>L</sup> Phe/D1/TCNB | 460         |
| <sup>L</sup> Tyr/D1      | 120         | <sup>D</sup> Phe/D1/TCNB | 500         |
| <sup>L</sup> Tyr/D5      | 480         | <sup>L</sup> Phe/D2/TCNB | 580         |
| <sup>L</sup> Ala/D1      | 400-860     | <sup>D</sup> Phe/D2/TCNB | 530         |
| <sup>L</sup> Ala/D5      | 330         | <sup>L</sup> Phe/D3/TCNB | 310-580     |
| <sup>L</sup> Phe/D1      | 230         | <sup>D</sup> Phe/D3/TCNB | 490-670     |
| <sup>L</sup> Phe/D5      | 140         | <sup>L</sup> Phe/D4/TCNB | 580-660     |
| <sup>L</sup> Tyr/D1/TCNB | 320-980     | <sup>D</sup> Phe/D4/TCNB | 420-710     |
| <sup>D</sup> Tyr/D1/TCNB | 470-810     | <sup>L</sup> Phe/D5/TCNB | 210-590     |
| <sup>L</sup> Tyr/D2/TCNB | 270-880     | <sup>D</sup> Phe/D5/TCNB | 310-660     |
| <sup>D</sup> Tyr/D2/TCNB | 450-890     |                          |             |

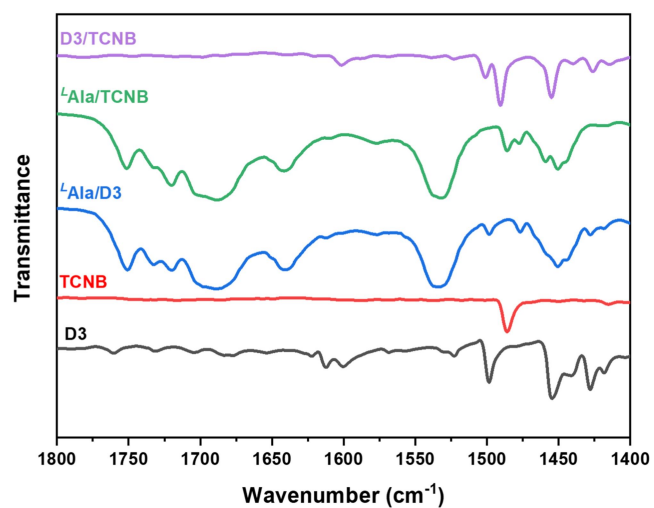

**Fig. S34** FTIR spectra of individual **D3** and **TCNB** assemblies (5.6 mM), and assemblies of **L-Ala/D3**, **L-Ala/TCNB** and **D3/TCNB** (5.6 mM:5.6 mM) formed in DMF/H<sub>2</sub>O (1/19, v/v).
